1 **Identification of the myogenetic oligodeoxynucleotides (myoDNs) that**  
2 **promote differentiation of skeletal muscle myoblasts by targeting nucleolin**

3

4 Sayaka Shinji<sup>1</sup>, Koji Umezawa<sup>2,3</sup>, Yuma Nihashi<sup>4</sup>, Shunichi Nakamura<sup>1</sup>,  
5 Takeshi Shimosato<sup>1,2,3,4</sup>, Tomohide Takaya<sup>1,2,3,4\*</sup>

6

7 <sup>1</sup>Department of Agriculture, Graduate School of Science and Technology,  
8 Shinshu University, Nagano, Japan;

9 <sup>2</sup>Department of Agricultural and Life Science, Faculty of Agriculture,  
10 Shinshu University, Nagano, Japan;

11 <sup>3</sup>Department of Biomolecular Innovation, Institute for Biomedical Sciences,  
12 Shinshu University, Nagano, Japan;

13 <sup>4</sup>Department of Science and Technology, Graduate School of Medicine,  
14 Science and Technology, Shinshu University, Nagano, Japan

15

16 \*For correspondence:

17 ttakaya@shinshu-u.ac.jp.

18

19 **Abstract**

20

21 Herein we report that the 18-base telomeric oligodeoxynucleotides (ODNs)  
22 designed from the *Lactobacillus rhamnosus* GG genome promote  
23 differentiation of skeletal muscle myoblasts which are myogenic precursor  
24 cells. We termed these myogenetic ODNs (myoDNs). The activity of one of  
25 the myoDNs, iSN04, was independent of Toll-like receptors, but dependent  
26 on its conformational state. Molecular simulation and iSN04 mutants  
27 revealed stacking of the 13-15th guanines as a core structure for iSN04. The  
28 alkaloid berberine bound to the guanine stack and enhanced iSN04 activity,  
29 probably by stabilizing and optimizing iSN04 conformation. We further  
30 identified nucleolin as an iSN04-binding protein. Results showed that iSN04  
31 antagonizes nucleolin, increases the levels of p53 protein translationally  
32 suppressed by nucleolin, and eventually induces myotube formation by  
33 modulating the expression of genes involved in myogenic differentiation and  
34 cell cycle arrest. This study shows that bacterial-derived myoDNs serve as  
35 aptamers and are potential nucleic acid drugs directly targeting myoblasts.

36

37 **Keywords**

38 oligodeoxynucleotide, berberine, nucleolin, skeletal muscle myoblast,  
39 myogenic differentiation

40

## 41 Introduction

42

43 Skeletal muscle myoblasts are myogenic precursor cells that play a  
44 central role during muscle development and regeneration. In the first step of  
45 these processes, muscle stem cells called satellite cells on myofibers are  
46 activated into myoblasts. After several rounds of division, myoblasts  
47 differentiate into myocytes, which is led by myogenic transcription factors  
48 such as MyoD and myogenin. Myocytes then fuse to form multi-nuclear  
49 myotubes to generate or restore myofibers (Dumont et al., 2015). However,  
50 the differentiation ability of myoblasts declines due to aging or diseases.  
51 Aged murine myoblasts tend to differentiate into the fibrogenic lineage by  
52 the activation of the canonical Wnt pathway (Brack et al., 2007). The  
53 myoblasts isolated from the chronic kidney disease mice model showing  
54 muscle atrophy display attenuated MyoD expression and myotube formation  
55 (Zhang et al., 2010). Cancer-conditioned media inhibit myogenic  
56 differentiation by upregulating C/EBP $\beta$  in the murine myoblast cell line  
57 C2C12 (Marchildon et al., 2015). Such hypoactivities of myoblasts are  
58 considered to be one of the reasons for the development of muscle atrophy  
59 (Fukada, 2018; McCormick and Vasilaki, 2018). Therefore, myoblast  
60 differentiation can be a clinical target for sarcopenia, disease-related muscle  
61 wasting, and cancer cachexia which are risk factors for mortality (Anker et  
62 al., 1997; Rubin, 2003; Carrero et al., 2008).

63 Several molecules have been identified that facilitate myogenic  
64 differentiation. Histone deacetylase inhibitors (HDACIs), trichostatin A

65 (TSA) and valproic acid (VPA), promote myotube formation by inducing  
66 follistatin in myoblasts (Iezzi et al., 2004). However, TSA and VPA are  
67 non-specific HDACIs that affect a broad range of biological processes in vivo.  
68 Recent studies have reported that the combined treatment of ursolic acid  
69 (UA) with leucine (Kim et al., 2015), and a single treatment of an oleanolic  
70 acid (OA) derivative (Cui et al., 2019) potentiates differentiation of C2C12  
71 cells. As the half-lives of UA in plasma and OA in serum are less than 1 h  
72 (Chen et al., 2011; Li et al., 2012), their pharmacokinetic parameters need to  
73 be improved for clinical application.

74 Nucleic acids have tremendous potential for use in next-generation  
75 drugs. They are chemically synthesized, stable, and modifiable molecules  
76 that can access diverse targets with high specificities. Complementary  
77 antisense oligonucleotides modulate gene expression by degrading mRNAs,  
78 trapping microRNAs, or correcting splicing events (Quemener et al., 2020).  
79 Other types of oligonucleotides serve as aptamers that specifically interact  
80 with their target proteins (Wang et al., 2019). Furthermore, many  
81 immunomodulatory oligodeoxynucleotides (ODNs) from microbial and  
82 autologous DNA sequences have been reported. ODNs with unmethylated  
83 CpG motifs (CpG-ODNs) serve as ligands for Toll-like receptor (TLR) 9 and  
84 initiate an inflammatory cascade (Vollmer and Krieg, 2009). In contrast,  
85 inhibitory ODNs (iODNs) representatively expressing telomeric elements  
86 suppress immunological reactions depending on TLR3, TLR7, and TLR9  
87 (Klinman et al., 2008; Sackesen et al., 2013). At present, CpG-ODNs and

88 iODNs are anticipated to be effective drugs for sepsis and allergic diseases  
89 ([Yamamoto et al., 2017](#); [Wang et al., 2015](#)).

90 Intriguingly, some CpG-ODNs have been reported to alter cell fate.  
91 Initial studies have shown that CpG-1826 modulates osteoclastogenesis  
92 through TLR9 ([Zou et al., 2003](#); [Amcheslavsky et al., 2005](#)). CpG-KSK13  
93 displayed an inhibitory effect on osteoclast differentiation by downregulating  
94 TREM-2 ([Chang et al., 2009](#)). CpG-2006 and its variants interfere with  
95 osteoblast differentiation from mesenchymal stem cells (MSCs) by inhibiting  
96 the BMP-Smad signal in a TLR9-independent manner ([Norgaard et al.,](#)  
97 [2010](#)). By contrast, MT01, a 27-base C-rich iODN ([Yang et al., 2010](#)),  
98 stimulates the differentiation of MSCs into osteoblasts via the ERK-p38  
99 pathway ([Feng et al., 2011](#); [Shen et al., 2012](#); [Hou et al., 2012](#)).

100 These findings prompted us to explore a novel ODN that regulates  
101 myoblast differentiation. We recently constructed 18-base ODN candidates  
102 designed from the genome sequence of a lactic acid bacteria strain,  
103 *Lactobacillus rhamnosus* GG (LGG) ([Nigar et al., 2017](#)). These synthetic  
104 phosphorothioated (PS)-ODNs resistant to nucleases were applied to  
105 myoblasts to validate their myogenetic effects. Herein, we report a series of  
106 18-base telomeric PS-ODNs, named myogenetic ODNs (myoDNs), that  
107 promote myoblast differentiation depending on their conformation but  
108 independent of TLR signal. This study presents an innovative approach to  
109 regulate cell fate using bacterial-derived ODNs.

110

## 111 Results

112

### 113 *Identification of myoDNs*

114 Fifty 18-base PS-ODNs (iSN01-iSN50) (Table S1) derived from the  
115 LGG genome were subjected to a screening system to investigate the effects  
116 on myogenic differentiation of primary-cultured murine myoblasts (mMBs).  
117 10  $\mu$ M PS-ODNs were administered to the mMBs maintained in growth  
118 medium (GM) for 48 h. The mMBs were immunostained for myosin heavy  
119 chain (MHC), a terminal differentiation marker of skeletal muscle (Figure  
120 S1). The percentages of MHC<sup>+</sup> cells were automatically quantified in a  
121 non-biased manner. As shown in Figure 1A, seven PS-ODNs (iSN01-iSN07)  
122 significantly increased the ratio of MHC<sup>+</sup> cells, but other PS-ODNs did not  
123 alter the differentiation of mMBs. iSN01-iSN07 reproducibly induced  
124 myogenic differentiation of another independently isolated lot of mMBs  
125 (Figure S2A), regardless of variation in the basal differentiation efficiency. In  
126 both screening results, iSN04' exhibited the highest myogenetic activity  
127 (Figures 1A and S2A). These experiments were performed using iSN04' (AAG  
128 TTA GGG TGA GGG TGA; not existing in LGG genome) instead of iSN04  
129 (AGA TTA GGG TGA GGG TGA; existing in LGG genome). As the activities  
130 of iSN04' and iSN04 were completely equal (Figure S2C), iSN04 was utilized  
131 in the following experiments. iSN04 also promoted myogenic differentiation  
132 of the murine myoblast cell line C2C12 (Figure S2D) and primary-cultured  
133 human myoblasts (hMBs) (Figure 1B). The ratio of MHC<sup>+</sup> myocytes and

134 fused myotubes was significantly increased by iSN04 in myoblasts in both  
135 mice and humans.

136 In stem cells or their progenies, proliferation and differentiation are  
137 inverse processes, which negatively regulate each other (Ruijtenberg and  
138 van den Heuvel, 2016). The number of mMBs treated with iSN01-iSN07 was  
139 significantly lower than that of the control (Figure S2B), indicating that  
140 iSN01-iSN07 inhibits myoblast proliferation. Continuous cell counting  
141 revealed that iSN04 suppressed the growth of mMBs in a dose-dependent  
142 manner; however, iSN04 did not alter the number of murine embryonic  
143 fibroblasts (MEFs) (Figure 1C). This demonstrates that the reduction in cell  
144 numbers in the iSN04-treated myoblasts was due to enhanced myogenic  
145 differentiation. Quantitative real-time RT-PCR (qPCR) revealed that iSN04  
146 significantly upregulated the levels of myogenic transcription factors MyoD  
147 (*MYOD1*) and myogenin (*MYOG*), resulting in marked induction of  
148 embryonic MHC (*MYH3*) in hMBs (Figure 1D). In contrast, iSN04 did not  
149 alter the levels of undifferentiated myoblast markers, Pax7 (*PAX7*) and Myf5  
150 (*MYF5*). These data show that iSN04 inherently promotes myoblast  
151 differentiation by activating the myogenic gene expression program.

152 We designated iSN01-iSN07 as “myoDNs”, denoting myogenetic  
153 ODNs. They are a novel type of ODNs that induce myoblast differentiation.

154

#### 155 *myoDN activity is independent of TLR signal*

156 iSN01-iSN07 share a tandem repeat of a telomeric hexamer  
157 (TTAGGG TGAGGG) (Figure S2E). A previous study has reported that a

158 24-base telomeric iODN (Tel-ODN) (Table S1) suppresses human B-cell  
159 activation depending on TLR3, TLR7, and TLR9 (Sackesen et al., 2013). We  
160 have indicated that a 17-base telomeric iODN (iSG3; CCTCA TTAGGG  
161 TGAGGG) inhibits CpG-ODN (MsST)-induced interleukin (IL)-6 expression  
162 through intracellular incorporation in murine macrophages (Wang et al.,  
163 2015). Administration of 6-carboxyfluorescein (6-FAM)-conjugated iSN04 to  
164 hMBs also showed that iSN04 was internalized into the cytoplasm within 2 h  
165 (Figure 1E). Contrarily, we have already confirmed that iSN01-iSN07 does  
166 not affect MsST-induced IL-6 expression in murine splenocytes (Nigar et al.,  
167 2017), suggesting that myoDNs are not iODNs. RT-PCR revealed that hMBs,  
168 mMBs, and C2C12 cells expressed all TLR genes except for *Tlr12* in C2C12  
169 cells (Figure S3A and S3B). To investigate the dependency of myoDN activity  
170 on TLR signaling, hMBs were treated with iSN04, Tel-ODN, or CpG-2006  
171 (Table S1). CpG-2006 is the TLR9 ligand initiating inflammatory responses  
172 in human lymphocytes and murine macrophages (Pohar et al., 2015). In the  
173 absence of iSN04, neither CpG-2006 nor Tel-ODN induced the differentiation  
174 of hMBs into MHC<sup>+</sup> myocytes (Figure 1F). In the presence of iSN04, neither  
175 CpG-2006 nor Tel-ODN inhibited iSN04-induced myogenic differentiation.  
176 RNA sequencing (RNA-seq) data (see next section) showed that transcription  
177 levels of the genes involved in the TLR signaling pathway were not altered in  
178 the iSN04-treated hMBs (Figure S3C). These results demonstrate that  
179 iSN04 is not a TLR ligand, dissimilar to immunogenic CpG-ODNs and  
180 iODNs. It is assumed that myoDN activity inducing myogenic differentiation  
181 is independent of TLR signaling.



182

183 ***Profile of iSN04-dependent gene expression***

184 We comprehensively surveyed the iSN04-dependent gene expression  
185 profile of hMBs. Total RNA of the hMBs treated with 30  $\mu$ M iSN04 in  
186 differentiation medium (DM) for 24 h was subjected to RNA-seq ([Figure S4A](#)).  
187 51.3 million reads per sample were acquired, of which approximately 45.9  
188 million reads (90.0%) were mapped to a human reference genome ([Table S3](#)).  
189 In total, 60,448 transcripts were identified and their expression levels were  
190 calculated as fragments per kilobase per million reads (FPKM). FPKM  
191 values of myogenic genes exhibited a pattern compatible with qPCR results;  
192 iSN04 significantly downregulated *MYF5* and upregulated *MYOD1* and  
193 *MYOG* ([Figure S4B](#)). A total of 22,269 transcripts showed significant  
194 expression levels (FPKM > 0.1) in the control or iSN04 group. Of them, 899  
195 transcripts were differentially transcribed (> 1.5-fold) with the significance  
196 of false discovery rate (FDR)  $p < 0.05$  ([Supplementary Data](#)). Of which 476  
197 and 423 transcripts were upregulated and downregulated by iSN04,  
198 respectively. These differentially expressed genes (DEGs) depending on  
199 iSN04 were subjected to gene ontology (GO) analysis. The 476  
200 iSN04-upregulated DEGs significantly formed multiple gene clusters for  
201 muscle adaptation, contraction, and formation, which abundantly included  
202 sarcomeric components (myosin, actin, troponin, and their associated  
203 proteins) and transcription factors (myogenin, Hes1, Smad7, and Wnt10a)  
204 ([Figure 2A](#)). In contrast, the 423 iSN04-downregulated DEGs involved many  
205 clusters related to cell cycle and proliferation with higher significance

206 (Figure 2B). These expression profiles of the iSN04-dependent DEGs  
207 corresponded well with the phenotype of iSN04-treated myoblasts, which  
208 showed promoted myogenic differentiation and arrested cell growth.  
209 STRING analysis visualized functional and physiological interactions of the  
210 DEGs or their products (Figure 2C). The tightly connected networks were  
211 detected in both DEG groups. Especially within the iSN04-downregulated  
212 group, 173 of the 423 DEGs (40.9%) were concentrated in the primary cluster,  
213 suggesting that iSN04 possibly suppresses at least one of the major nodes of  
214 the transcriptome at the early stage regulating myoblast fate. These data  
215 indicate that iSN04 globally modulates gene expression by orchestrating the  
216 myogenic program and cell cycle in myoblasts.

217

### 218 *myoDN activity is dependent on its structure*

219 ODNs are classified into three categories according to their  
220 mechanism of action: antisense nucleotides, aptamers, and immunogenic  
221 ODNs as TLR ligands. myoDN activity was independent of TLR signals.  
222 Furthermore, immunogenic ODNs are often species-specific (Pohar et al.,  
223 2015), but iSN04 induces the differentiation of both murine and human  
224 myoblasts. To investigate the potential of myoDNs as antisense ODNs, the  
225 homologous sequences of iSN04 in human and murine genomes were  
226 surveyed using Basic Local Alignment Search Tool (BLAST). The BLAST  
227 results displayed 59 loci in humans and 39 loci in mice that had  
228 iSN04-homologous sequences. However, there was no common gene or locus  
229 between humans and mice, denying that iSN04 serves as an antisense

230 nucleotide. Intriguingly, the heat-denatured iSN02 lost the ability to induce  
231 myoblast differentiation (Figure S2F), which strongly suggests that myoDN  
232 activity arises from its structure. Notably, iSN04 was resistant to thermal  
233 denaturation (Figure S2G). The iSN04 conformation is considered to be  
234 relatively stable and can recover from denaturation in a short period. This  
235 might also be the reason why iSN04 presented the highest activity among  
236 the myoDNs.

237         The conformational properties of iSN04 under water conditions were  
238 computationally investigated using trivial trajectory parallelization of  
239 multicanonical molecular dynamics (TTP-McMD) (Ikebe et al., 2011). iSN04  
240 at 310 K showed a compact globular structure (average radius: 0.96 nm), not  
241 a linear strand (Figure 3A). iSN04 displayed varied conformations, but their  
242 variations seemed to be limited within a certain range (Supplementary  
243 Movie). For fine conformation analysis, the contact probabilities between the  
244 residues of iSN04 were calculated. The ensemble-averaged contact  
245 probabilities at 310 K over all the simulated iSN04 structures were rendered  
246 as a contact map (Figure 3B). Three guanines at the 13-15th bases stacked  
247 upon each other, suggesting that this G<sub>13-15</sub> stack is the stable center of the  
248 iSN04 structure. The impact of the G<sub>13-15</sub> bases on iSN04 activity was  
249 examined using mutant iSN04. A series of deletions in the G<sub>13-15</sub> bases  
250 gradually attenuated the myogenetic activity of iSN04. In particular,  
251 iSN04<sup>Δ13-15</sup> completely lost its activity (Figure 3G), demonstrating that the  
252 G<sub>13-15</sub> stack is indispensable for iSN04 activity.

253

254 *Berberine enhances iSN04 activity*

255 We hypothesized that stabilization of the G<sub>13-15</sub> stack would improve  
256 iSN04 activity. Telomeric DNA is known to form a highly ordered  
257 conformation. The G-quartet is a square aromatic surface constructed by the  
258 four guanines interacting with its neighbors via two hydrogen bonds.  
259 G-quartets stack upon each other to build the four-stranded G-quadruplex  
260 (Ou et al., 2008). Berberine, an isoquinoline alkaloid (Figure S5A), interacts  
261 with the G-quartet and stabilizes the G-quadruplex structure derived from  
262 human telomeric DNA (Bazzicalupi et al., 2012). We tested whether iSN04  
263 physically interacts with berberine. Briefly, iSN04 and berberine were mixed  
264 in F10 medium (Table S4), subjected to electrophoresis, and stained with  
265 ethidium bromide (EtBr), which fluoresces red at 620 nm. The  
266 iSN04-berberine complex can be imaged with yellow fluorescence because  
267 berberine fluoresces green at 530 nm (Guo et al., 2015; Shinji et al., 2020).  
268 Indeed, yellow emissions of the iSN04-berberine complex were detected at a  
269 slightly higher molecular weight compared to iSN04 alone (Figure 3E). Not  
270 only iSN04 but also all other myoDNs interacted with berberine (Figure  
271 S5C). G-quartets generally coordinate cations (Ou et al., 2008), and  
272 berberine binds to the telomeric DNA holding K<sup>+</sup> (Bazzicalupi et al., 2012).  
273 We examined the requirement of cations for the iSN04-berberine complex  
274 using cationic solutions. Ca<sup>2+</sup> was found to be necessary for the  
275 iSN04-berberine complex (Figure S5B). Moreover, Mg<sup>2+</sup> facilitated the  
276 interaction between iSN04 and berberine, but its effect was markedly  
277 weaker than that of Ca<sup>2+</sup>. These results suggest that berberine binds to the

278 G-quartet- or G-quadruplex-like structure within iSN04, which is probably  
279 formed by the G<sub>13-15</sub> stack.

280 Administration of iSN04 and berberine to mMBs proved that the  
281 activity of the iSN04-berberine complex was significantly higher than that of  
282 single iSN04 (Figure 3F). As berberine alone did not alter myoblast  
283 differentiation, it is possible that the improved activity of the  
284 iSN04-berberine complex is not a synergistic effect. Berberine is speculated  
285 to enhance the inherent activity of iSN04 by stabilizing or shifting the  
286 conformation. In some cases, one G-quartet binds to two berberine molecules  
287 (Bazzicalupi et al., 2012). To optimize the molar ratio of iSN04 to berberine,  
288 mMBs were treated with 0-3  $\mu$ M iSN04 and 0-30  $\mu$ M berberine. iSN04  
289 exhibited the highest myogenetic activity when mMBs were co-treated with  
290 an equal molar of berberine (Figure 3H). Conformation of the  
291 iSN04-berberine complex at a molar ratio of 1:1 was simulated using  
292 TTP-McMD. Berberine interacted exactly with the G<sub>13-15</sub> stack of iSN04  
293 (Figure 3C). Deletions of the G<sub>13-15</sub> bases of iSN04 experimentally  
294 demonstrated that berberine actually interacts with these guanines (Figure  
295 3I, upper panel). The contact map of the iSN04-berberine complex showed  
296 that the G<sub>7-9</sub> bases are stacked in addition to the G<sub>13-15</sub> stack (Figure 3D).  
297 Berberine also contacted the G<sub>9</sub> and consequently, it fits into the pocket  
298 assembled from the G<sub>7-9</sub> and G<sub>13-15</sub> stacks. iSN04 has two telomeric  
299 hexamers; TTAGGG and TGAGGG. We investigated the influence of the T<sub>5</sub>  
300 and G<sub>11</sub> of iSN04 on myogenetic activity and berberine binding. Both the T5G  
301 and G11T substitutions did not affect iSN04 activity (Figure 3G). However,

302 the T5G substitution interfered with the formation of iSN04-berberine  
303 complex, and iSN04<sup>G11T</sup> interacted with berberine as well as intact iSN04  
304 (Figure 3I, lower panel). The contact maps indicated that the T<sub>5</sub> relatively  
305 remains at a distance from other bases. On the contrary, guanines tend to  
306 interact with other bases. The extra guanine inserted by the T5G  
307 substitution might have perturbed the pocket required for iSN04 to bind to  
308 berberine.

309 We further examined the iSN04-enhancing abilities of three  
310 berberine analogs, coptisine, palmatine, and jatrorrhizine (Figure S5A).  
311 Coptisine and berberine formed a complex with iSN04. Palmatine weakly  
312 interacted with iSN04, but jatrorrhizine did not interact at all (Figure 3J).  
313 Correspondingly, coptisine significantly improved the myogenetic activity of  
314 iSN04 to the same level as the iSN04-berberine complex (Figure 3K). These  
315 results illustrate that the 2,3-methylenedioxy ring of the berberine backbone  
316 is important for interacting with iSN04.

317

### 318 *iSN04 targets nucleolin and increases p53 protein*

319 The structure-dependent myogenetic activity of iSN04 suggests the  
320 presence of iSN04-target proteins. We surveyed iSN04-binding proteins by  
321 precipitation assay. Biotin-conjugated iSN04 was immobilized on  
322 streptavidin-beads at the 5' or 3' end (iSN04-5'-Bio and iSN04-3'-Bio,  
323 respectively). Soluble whole-cell lysates were pre-pulled-down with  
324 iSN14-beads to eliminate the absorption of non-specific proteins onto ODNs  
325 or beads. After removing off-target proteins, the lysates were precipitated

326 with iSN04-beads, followed to SDS-PAGE and CBB staining. Surprisingly,  
327 iSN04-binding protein was not detected in C2C12 cell lysates (data not  
328 shown). Next, the lysate of the murine osteoblast cell line MC3T3-E1 was  
329 prepared because iSN04 affected MC3T3-E1 differentiation (unpublished  
330 data). Both iSN04-5'-Bio and iSN04-3'-Bio precipitated the identical single  
331 protein with an expected size of 112 kDa, which was not precipitated by  
332 iSN14-beads or beads alone (Figure 4A). Mass spectrometry identified the  
333 iSN04-binding protein as nucleolin (Tables S5 and S6). Although the  
334 molecular weight of nucleolin is 77 kDa, it is practically detected at 100-110  
335 kDa because of the acidic amino acids in the N-terminal domain (Jia et al.,  
336 2017). Nucleolin is a multifunctional phosphoprotein located in the nucleolus,  
337 cytoplasm, and plasma membrane depending on the context of cellular  
338 processes such as gene expression, protein shuttling, cytokinesis, and  
339 apoptosis. Expression and subcellular localization of nucleolin are frequently  
340 abnormal in rapidly growing cells, typically cancers (Jia et al., 2017). A  
341 recent study reported that the amount and localization of nucleolin is  
342 involved in myogenic differentiation of C2C12 cells (Tang et al., 2017), but its  
343 precise mechanism is still unknown.

344 A 26-base G-rich non-immunogenic ODN, AS1411 (Table S1), is an  
345 established anti-nucleolin aptamer which has been utilized in several  
346 clinical trials on cancers (Bates et al., 2009; Yazdian-Robati et al., 2019).  
347 AS1411 promoted myogenic differentiation of hMBs to the same extent as  
348 iSN04 (Figure 4B), proving that iSN04 targets nucleolin in myoblasts.  
349 Immunostaining revealed that nucleolin initially localized in the nucleoli of

350 hMBs and C2C12 cells in their undifferentiated states. Nucleolin was then  
351 translocated into the cytoplasm of MHC<sup>+</sup> myotubes throughout myogenic  
352 differentiation (Figures 4C and S6A) as previously reported (Tang et al.,  
353 2017). The mRNA levels of nucleolin (*NCL*) in hMBs were increased during  
354 differentiation but did not change after iSN04 treatment (Figure S6C and  
355 S6D). In addition, nucleolin localization in hMBs or C2C12 cells was not  
356 shifted by iSN04 or AS1411 (Figures 4D and S6B). These results correspond  
357 to those of previous studies, which confirmed that AS1411 does not alter  
358 nucleolin localization in cancer cells (Litchfield et al., 2012; Reyes-Reyes et  
359 al., 2015; Ramos et al., 2020). Nucleolin has been reported to target the  
360 untranslated region (UTR) of p53 mRNA to interfere with its translation in  
361 tumor cells (Takagi et al., 2005; Chen et al., 2012). Nucleolin inhibition by  
362 AS1411 increases p53 protein levels and suppresses cell proliferation in  
363 glioma cells (Cheng et al., 2016). As p53 induces myogenic differentiation  
364 (Cerone et al., 2000; Porrello et al., 2000), antagonizing nucleolin in  
365 myoblasts by iSN04 or AS1411 was assumed to upregulate p53 protein and  
366 promote differentiation. RNA-seq data showed that the iSN04-dependent  
367 DEGs were enriched in the p53 signaling pathway (Figures 4E and S6E).  
368 Western blotting showed that both iSN04 and AS1411 increased p53 protein  
369 levels in hMBs (Figure 4F), even though iSN04 decreased the mRNA level of  
370 p53 (*TP53*) (Figure S6F).

371         These data demonstrate that iSN04 antagonizes nucleolin to recover  
372 the suppressed p53 translation. The iSN04-increased p53 protein level  
373 activates downstream signal to arrest the cell cycle and induce myoblast



374 differentiation. The results of this study present evidence that

375 bacterial-derived ODNs can serve as aptamers to modulate cell fate.

376

377 **Discussion**

378

379 To our knowledge, this is the first report of the ODNs promoting  
380 myogenic differentiation of skeletal muscle myoblasts. myoDNs are 18-base  
381 telomeric ODNs designed from the LGG genome sequence. Such bacterial  
382 ODNs serve as immunogenic ODNs recognized by TLRs and modulate the  
383 innate immune system (Krieg et al., 1995; Klinman, 2008). Among them,  
384 telomeric ODNs, also termed iODNs, are known to suppress inflammatory  
385 responses (Sackesen et al., 2013; Wang et al., 2015). In our previous study,  
386 myoDNs (iSN01-iSN07) were not iODNs (Nigar et al., 2017). iSN04, the  
387 myoDN presenting the highest activity, induced myoblast differentiation  
388 independent of TLR signaling. myoDNs are thus defined as a novel type of  
389 ODN that regulates cell fate through a unique mechanism. A previous study  
390 reported that CpG-2006 interferes with the osteoblastic differentiation of  
391 MSCs in a TLR9-independent manner, but its direct target is unknown  
392 (Norgaard et al., 2010). CpG-2006 was originally identified as a TLR9 ligand  
393 that activates immune responses (Hartmann et al., 2000; Bauer et al., 2001).  
394 The dual role of CpG-2006, in addition to myoDNs, implies that other  
395 bacterial ODNs might also exert non-immunological functions.

396 The present study revealed that the myogenetic activity of iSN04  
397 arises from its conformation rather than its sequence. Molecular simulation  
398 and a series of mutant iSN04 demonstrated that the G<sub>13-15</sub> stack within the  
399 second telomeric hexamer is essential for iSN04 activity. It is also indicated  
400 that berberine physically interacts with iSN04 via the G<sub>13-15</sub> stack and

401 enhances the myogenetic ability of iSN04, probably by stabilizing or  
402 optimizing the structure. This is the initial instance of functional  
403 improvement of ODNs by small molecules. Berberine is a safe isoquinoline  
404 alkaloid isolated from medicinal plants, that exhibits various bioactivities  
405 and has been utilized in clinical studies on diabetes, osteoporosis, and cancer  
406 ([Imenshahidi and Hosseinzadeh, 2019](#)). Berberine has also been studied as a  
407 ligand of the G-quadruplex, which is often formed in oncogenic promoter  
408 regions and regulates gene expression by recruiting transcriptional  
409 machinery ([Siddiqui-Jain et al., 2002](#)). Therefore, berberine derivatives that  
410 block G-quadruplexes can be potential anti-tumor drugs ([Ou et al., 2008](#);  
411 [Bazzicalupi et al., 2012](#)). From these points of view, the modification of the  
412 structure and function of telomeric ODN by berberine provides a safe and  
413 reasonable technique for further research, development, and application of  
414 ODNs.

415 We identified nucleolin as a direct target of iSN04. The established  
416 anti-nucleolin aptamer, AS1411, also promoted myoblast differentiation,  
417 which proved that iSN04 antagonizes nucleolin. AS1411 has been reported to  
418 polymorphically fold into various conformations, including G-quadruplex  
419 structures ([Dailey et al., 2010](#); [Figure S6G](#)). Interestingly, iSN04 but not  
420 AS1411 interacted with berberine ([Figure S5D](#)), and AS1411 but not iSN04  
421 decreased nucleolin levels ([Figure 4F](#)), which suggests the presence of subtle  
422 structural and functional differences. Experimental determination of the  
423 iSN04 structure will provide valuable information on the similarity and  
424 dissimilarity between iSN04 and AS1411, which will be useful for building

425 novel aptamers based on their conformations. Aptamers are usually  
426 developed via in vitro methodology using a specific target, systemic evolution  
427 of ligands by exponential enrichment (SELEX) (Wang et al., 2019). However,  
428 AS1411 is a non-SELEX aptamer that was screened as an inhibitor for  
429 cancer cell growth (Bates et al., 2009). Precipitation assay and mass  
430 spectrometry identified nucleolin as an AS1411 target (Girvan et al., 2006).  
431 Although AS1411 interacts with at least 15 proteins including nucleolin  
432 (Girvan et al., 2006), nucleolin has been a primary target of AS1411. Because  
433 aptamers usually recognize membrane proteins, and nucleolin is present on  
434 the plasma membrane of cancer cells (Bates et al., 2009; Jia et al., 2017;  
435 Yazdian-Robati et al., 2019).

436         Unlike many aptamers, iSN04 and AS1411 exert their effects inside  
437 myoblasts. iSN04 was spontaneously incorporated into myoblasts. Nucleolin  
438 initially localized in the nucleoli of growing myoblasts and diffused into the  
439 cytoplasm during myotube formation. However, iSN04 and nucleolin were  
440 not observed on the surface of myoblasts throughout differentiation. As  
441 discussed below, nuclear nucleolin serves as an mRNA-binding protein that  
442 regulates translation (Fahling et al., 2006). These findings indicate that  
443 iSN04 and AS1411 conceivably function in the nuclei of myoblasts. In  
444 general, single-strand ODNs are efficiently taken into the cytoplasm without  
445 carriers through gymnosis. Although its mechanism has not been completely  
446 understood, ODNs are considered to be incorporated by endocytosis,  
447 transported to the endosome, and are transferred to the cytoplasm through  
448 the endosomal membrane, probably due to their lower molecular weights

449 and higher hydrophobicities compared to double-strand nucleotides. The  
450 released ODNs into the cytoplasm can accumulate in the nucleus by  
451 associating with chaperones or RNA-binding proteins (Juliano, 2018).

452 Nucleolin interferes with the translation of p53 mRNA by binding to  
453 its UTR (Takagi et al., 2005; Chen et al., 2012). Our study showed that  
454 antagonizing nucleolin by iSN04 or AS1411 increased p53 protein levels in  
455 myoblasts, as reported in AS1411-treated glioma cells (Cheng et al., 2016).  
456 The role of p53 in myoblasts has been intensively studied. An initial study  
457 found that the dominant-negative form of p53 inhibits the differentiation of  
458 C2C12 cells (Soddu et al., 1996). During myogenic differentiation, p53  
459 cooperates with MyoD (Cerone et al., 2000) to activate transcription of  
460 retinoblastoma protein (Porrello et al., 2000), which serves as a cofactor of  
461 MyoD to arrest the cell cycle and facilitate muscle cell commitment (Gu et al.,  
462 1993; Novitch et al., 1996). A recent study revealed that p53 with MyoD  
463 coactivates the expression of the pro-apoptotic protein PUMA (Harford et al.,  
464 2017), which is required for the apoptosis associated with myoblast  
465 differentiation (Shaltouki et al., 2007; Harford et al., 2010). This  
466 accumulating evidence corroborates the findings that iSN04 upregulates p53  
467 protein and induces myoblast differentiation.

468 Interestingly, iSN04 did not affect the growth of MEFs expressing  
469 nucleolin (Figure S6H). In the precipitation assays, iSN04 pulled down  
470 nucleolin in the lysates of MC3T3-E1 cells but not of C2C12 cells, even  
471 though the amounts of nucleolin were nearly equal between the lysates  
472 (Figure S6I). According to circumstances, nucleolin is post-translationally

473 modified such as phosphorylation and glycosylation (Barel et al., 2001;  
474 Losfeld et al., 2009), and interacts with various partners including  
475 nucleotides and proteins (Jia et al., 2017). Probably due to that, AS1411  
476 precipitates only certain forms of nucleolin (Teng et al., 2007; Bates et al.,  
477 2009). The amounts of the iSN04-binding form of nucleolin in C2C12 cells  
478 might be less than that in MC3T3-E1 cells and not enough to be detected via  
479 CBB staining. It is possible that the mode of existence of nucleolin differs  
480 among the cells, which affects its affinity to iSN04.

481         The precise role of nucleolin during myogenic differentiation is still  
482 not fully understood. A moderate decline in nucleolin protein by miR-34b has  
483 been reported to upregulate myogenic expression (Tang et al., 2017). This  
484 study showed that nucleolin levels decreased through differentiation of  
485 C2C12 cells; however, our results using primary-cultured hMBs showed  
486 increased nucleolin expression upon differentiation. As nucleolin is potently  
487 induced in actively proliferating cells like tumors (Jia et al., 2017), nucleolin  
488 levels might be high in the immortalized C2C12 cell line. Therefore,  
489 nucleolin function in myoblasts needs to be further investigated using  
490 primary-cultured cells or in vivo models. In both hMBs and C2C12 cells,  
491 nucleolin initially localized in the nucleoli and then diffused into the  
492 cytoplasm through differentiation. An analogous shift of nucleolin  
493 localization has been observed during adipogenic differentiation of 3T3-L1  
494 pre-adipocytes (Wang et al., 2015). The biological activities of nucleolin can  
495 vary depending on its subcellular distribution. Numerous studies have  
496 revealed that nucleolar nucleolin regulates RNA metabolism, nucleoplasmic

497 nucleolin modulates gene expression, cytoplasmic nucleolin serves as a  
498 shuttle protein, and cell surface nucleolin is involved in various signaling  
499 pathways (Jia et al., 2017). Elucidating the relationship between nucleolin  
500 localization and differentiation of precursor cells would be important to  
501 understand the fine-tuned mechanism of myoDNs.

502 In conclusion, this study presents that bacterial genome-derived  
503 myoDNs promote myogenic differentiation by targeting nucleolin. The  
504 myoDN activities can be enhanced by conformational changes via binding to  
505 berberine. myoDNs are expected to be novel and unique drug candidates for  
506 muscle diseases, including atrophy, in which myoblasts are functionally  
507 deteriorated.

508

509 **Materials and methods**

510

511 ***ODNs and chemicals.***

512 The sequences of the ODNs used in this study are described in [Table](#)  
513 [S1](#). PS-ODNs, 6-FAM-conjugated PS-ODNs, and biotin-conjugated PS-ODNs  
514 were synthesized and purified via HPLC (GeneDesign, Osaka, Japan).  
515 AS1411 having a phosphodiester backbone was synthesized and desalted  
516 (Integrated DNA Technologies, Coralville, IA, USA) as previously reported  
517 ([Girvan et al., 2006](#)). PS-ODNs, AS1411, berberine hydrochloride (Nacalai,  
518 Osaka, Japan), palmatine chloride hydrate (Nacalai), coptisine chloride  
519 (Wako, Osaka, Japan), and jatrorrhizine (Wako) were dissolved in  
520 endotoxin-free water. An equal volume of endotoxin-free water instead of  
521 PS-ODNs and berberine analogs served as negative controls.

522

523 ***Cell culture.***

524 All experimental procedures were conducted in accordance with the  
525 Regulations for Animal Experimentation of Shinshu University, and the  
526 animal experimentation protocol was approved by the Committee for Animal  
527 Experiments of Shinshu University. All cells were cultured at 37°C under 5%  
528 CO<sub>2</sub> throughout the experiments.

529 mMBs were isolated from the skeletal muscle of 4-week-old  
530 C57BL/6J mice (Clea Japan, Tokyo, Japan) as previously described ([Takaya](#)  
531 [et al., 2017](#); [Nihashi et al., 2019b](#)). mMBs were maintained on the dishes or  
532 plates coated with collagen type I-C (Cellmatrix; Nitta Gelatin, Osaka,



533 Japan), and cultured in GM for mMB consisting of Ham's F10 medium  
534 (Thermo Fisher Scientific, MA, USA), 20% fetal bovine serum (FBS)  
535 (HyClone; GE Healthcare, UT, USA), 2 ng/ml recombinant human basic  
536 fibroblast growth factor (Wako), and a mixture of 100 units/ml penicillin and  
537 100 µg/ml streptomycin (PS) (Nacalai).

538 Primary-cultured hMB stock of adult healthy female (CC-2580;  
539 Lonza, MD, USA) was maintained according to the manufacturer's  
540 instruction. hMBs were seeded on collagen-coated dishes, cultured in  
541 Skeletal Muscle Growth Media-2 (CC-3245; Lonza) as GM for hMB, and  
542 differentiation was induced in DM for hMB consisting of DMEM (Nacalai)  
543 with 2% horse serum (HS) (HyClone; GE Healthcare) and PS.

544 C2C12 cells (DS Pharma Biomedical, Osaka, Japan) were seeded on  
545 collagen-coated dishes, cultured in GM for C2C12 cells consisting of DMEM  
546 with 10% FBS and PS, and induced differentiation in DM for C2C12 cells  
547 consisting of DMEM with 2% HS and PS.

548 MEFs were prepared from E12 embryos of Slc:ICR mice (Japan SLC,  
549 Shizuoka, Japan). The embryos that were removed their heads and internal  
550 organs were minced in GM for MEFs consisting of DMEM with 10% FBS and  
551 PS. The tissue clusters were seeded and cultured for 3 days. Then outgrown  
552 cells were dissociated to single cells as MEFs using 0.25% trypsin with 1 mM  
553 EDTA (Wako).

554 MC3T3-E1 cells (RCB1126) were provided by RIKEN BRC (Tsukuba,  
555 Japan) through the Project for Realization of Regenerative Medicine and the

556 National Bio-Resource Project of the MEXT, Japan. The cells were  
557 maintained in EMEM (Wako) with 10% FBS and PS.

558

### 559 *Immunocytochemistry.*

560 Immunocytochemistry of myoblasts was performed as previously  
561 described (Takaya et al., 2017; Nihashi et al., 2019a; Nihashi et al., 2019b).  
562 The myoblasts were fixed with 2% paraformaldehyde, permeabilized with  
563 0.2% Triton X-100, and immunostained with 0.5 µg/ml mouse monoclonal  
564 anti-MHC antibody (MF20; R&D Systems, MN, USA) and 1.0 µg/ml rabbit  
565 polyclonal anti-nucleolin antibody (ab22758; Abcam, Cambridge, UK). 0.1  
566 µg/ml each of Alexa Fluor 488-conjugated donkey polyclonal anti-mouse IgG  
567 antibody and Alexa Fluor 594-conjugated donkey polyclonal anti-rabbit IgG  
568 antibody (Jackson ImmunoResearch, PA, USA) were used as secondary  
569 antibodies. Cell nuclei were stained with DAPI (Nacalai). High-resolution  
570 fluorescent images were taken under an EVOS FL Auto microscope  
571 (AMAFD1000; Thermo Fisher Scientific). The ratio of MHC<sup>+</sup> cells was  
572 defined as the number of nuclei in the MHC<sup>+</sup> cells divided by the total  
573 number of nuclei, and the fusion index was defined as the number of nuclei  
574 in the multinuclear MHC<sup>+</sup> myotubes divided by the total number of nuclei  
575 using ImageJ software (National Institutes of Health, USA).

576

### 577 *Screening system.*

578 1.0×10<sup>4</sup> mMBs or 5.0×10<sup>3</sup> hMBs in 100 µl GM/well were seeded on  
579 collagen-coated 96-well plates. The next day, the medium was replaced with

580 GM for mMB or DM for hMB containing PS-ODNs. After 48 h, the mMBs or  
581 hMBs were subjected to MHC and DAPI staining. Fluorescent images were  
582 automatically captured using CellInsight NXT (Thermo Fisher Scientific).  
583 The ratio of MHC<sup>+</sup> cells of mMBs and MHC signal intensities of hMBs were  
584 automatically measured using HCS Studio: Cellomics Scan software  
585 (Thermo Fisher Scientific). The average value of three wells (4 fields/well)  
586 served as the mean of each sample.

587

#### 588 *Cell counting.*

589  $5.0 \times 10^4$  mMBs/well were seeded on collagen-coated 24-well plates  
590 and  $5.0 \times 10^4$  MEFs/well were seeded on 12-well plates. The next day, the  
591 medium was replaced with medium containing 1 or 3  $\mu\text{M}$  iSN04. The cells  
592 were continuously cultured until cell counting. For counting, the cells were  
593 completely dissociated using 0.25% trypsin with 1 mM EDTA and the  
594 number of cells was counted using a hemocytometer.

595

#### 596 *qPCR.*

597  $2.5 \times 10^5$  hMBs in GM were seeded on collagen-coated 60-mm dishes.  
598 The next day, the medium was replaced with DM containing 30  $\mu\text{M}$  iSN04.  
599 After 24 h, total RNA of the hMBs was isolated using NucleoSpin RNA Plus  
600 (Macherey-Nagel, Düren, Germany) and was reverse transcribed using  
601 ReverTra Ace qPCR RT Master Mix (TOYOBO, Osaka, Japan). qPCR was  
602 performed using GoTaq qPCR Master Mix (Promega, WI, USA) with  
603 StepOne Real-Time PCR System (Thermo Fisher Scientific). The amount of

604 each transcript was normalized to that of tyrosine  
605 3-monooxygenase/tryptophan 5-monooxygenase activation protein zeta gene  
606 (*YWHAZ*). The results are presented as fold-change. Primer sequences are  
607 listed in [Table S2](#).

608

### 609 *RNA-seq.*

610 The total RNA of hMBs used for qPCR was subjected to RNA-seq  
611 (Novogene, Beijing, China). RNA quality was checked using an Agilent 2100  
612 Bioanalyzer (Agilent Technologies, Waldbronn, Germany). RNA integrity  
613 number (RIN) values were 10.0 (max score) in all samples ([Figure S4A](#)). The  
614 RNA was subjected to library preparation using Illumina TruSeq RNA and  
615 DNA Sample Prep Kits (Illumina, CA, USA). Library quality was confirmed  
616 using a Qubit 2.0 fluorometer (Life Technologies; Thermo Fisher Scientific)  
617 and Agilent 2100 Bioanalyzer. RNA-seq was performed using Illumina  
618 NovaSeq 6000 (Illumina) to generate > 6-GB raw data per sample. Raw data  
619 were recorded in FASTQ format. The quality of the read was calculated as  
620 the arithmetic mean of the Phred quality score. The reads with following  
621 characteristics were discarded: adapter contamination, when uncertain  
622 nucleotides constituted > 10% of either read, or when low quality nucleotides  
623 (base quality < 20) constituted > 50% of the read. The cleaned reads were  
624 mapped to a human reference genome (GRCh38.82) using TopHat2. The  
625 number of the reads and mapping efficiencies are summarized in [Table S3](#).  
626 Expression levels of the transcripts were calculated as FPKM values using  
627 HTSeq. FDR was employed to correct their *p* values.

628

629 ***Heatmap.***

630 Heatmaps of FPKM values were generated via Heatmapper  
631 (<http://www.heatmapper.ca/>) (Babicki et al., 2016) with the following  
632 settings: Clustering method, Average linkage; Distance measurement  
633 method, Pearson.

634

635 ***GO analysis.***

636 The iSN04-dependent DEGs were subjected to GO analysis using  
637 DAVID Bioinformatics Resources 6.8 (<https://david.ncifcrf.gov/>) (Huang et al.,  
638 2009). The GO terms in biological processes and the KEGG pathways with  $p$   
639 values  $< 0.005$  and  $< 0.05$ , respectively, were defined as significantly  
640 enriched gene clusters. Scatter plots of the DEGs were visualized using R  
641 software (R Development Core Team) with a Bioconductor package,  
642 Reactome Pathway Analysis (Yu and He, 2015).

643

644 ***STRING analysis.***

645 Functional and physiological interactions of the iSN04-dependent  
646 DEGs were visualized using STRING version 11.0 (<https://string-db.org/>)  
647 (Szklarczyk et al., 2019).

648

649 ***BLAST search.***

650 Homologous sequences of iSN04 in the genomes of humans (taxid:  
651 9605) and mice (taxid: 10088) were searched and scored using BLAST  
652 (<https://blast.ncbi.nlm.nih.gov/Blast.cgi>).

653

#### 654 *TTP-McMD.*

655 Starting with the simulation of a single-chain iSN04 structure built  
656 from its DNA sequence by NAB in AmberTools (Macke and Case, 1998),  
657 enhanced ensemble method, TTP-McMD (Ikebe et al., 2011) was conducted,  
658 to sample the equilibrated conformations at 310 K. In the TTP-McMD, the  
659 energy range of the multicanonical ensemble covered a temperature range  
660 from 280 K to 380 K. Sixty trajectories were used and the production run was  
661 conducted for 40 ns in each trajectory (total 2.4  $\mu$ s). Throughout the  
662 simulation, the force field of amber ff12SB (Maier et al., 2015) was used for  
663 iSN04, whereas the solvation effect was considered as a generalized-born  
664 model (Tsui and Case, 2001). The force field for the berberine molecule was  
665 constructed from the RESP charge assigned by the quantum mechanics  
666 result of the DFT method with B3-LYP/6-31G\*, and the other parameters  
667 were taken from GAFF (Wang et al., 2004). In the initial structure of the  
668 iSN04-berberine system, a berberine molecule were put at a distance of 40 Å  
669 from iSN04. The conformation of the iSN04-berberine complex was  
670 calculated via TTP-McMD under the same conditions as the iSN04  
671 simulation.

672

#### 673 *Agarose gel electrophoresis.*

674 0.8 nmol PS-ODNs and 0.8 nmol berberine analogs were mixed in 16  
675  $\mu$ l Ham's F10 medium (Table S4). In the experiments shown in Figure S5B,  
676 iSN04 and berberine were mixed in sterile water, or 4.5 mM of HCl, NaCl,  
677 MgCl<sub>2</sub>, KCl, CaCl<sub>2</sub>, or MnCl<sub>2</sub> solution, or 0.45 mM of FeSO<sub>4</sub>, CuSO<sub>4</sub>, or  
678 ZnSO<sub>4</sub> solution. The mixtures were placed at 4°C overnight, and then  
679 subjected to agarose gel electrophoresis using a TAE-buffered 3% agarose gel  
680 with 0.5  $\mu$ g/ml EtBr. For colored images, the gels were illuminated by 302  
681 nm ultraviolet (UV) using a UV Transilluminator (UVP, CA, USA) and the  
682 images were captured by a digital still camera without any filters. For  
683 monochromatic images, the gels were illuminated by 365-nm UV and the  
684 images were taken using ImageQuant LAS 500 with an emission bandpass  
685 filter of 560 nm (GE Healthcare).

686

687 ***Protein precipitation, SDS-PAGE, and CBB staining.***

688 Soluble whole-cell lysates of C2C12 and MC3T3-E1 cells were  
689 prepared using lysis buffer consisting of 0.1 M Tris-HCl (pH7.4), 75 mM  
690 NaCl, and 1% Triton X-100 (Nacalai) with protease inhibitor cocktail (1 mM  
691 4-(2-aminoethyl)benzenesulfonyl fluoride hydrochloride, 0.8  $\mu$ M aprotinin,  
692 15  $\mu$ M E-64, 20  $\mu$ M leupeptin hemisulfate monohydrate, 50  $\mu$ M bestatin, and  
693 10  $\mu$ M pepstatin A) (Nacalai). The biotin-conjugated PS-ODNs were  
694 immobilized on streptavidin-coated magnetic beads (Magosphere  
695 MS300/Streptavidin; JSR Life Sciences, CA, USA) according to the  
696 manufacturer's instruction. 100  $\mu$ g of lysates and 0.6 mg of iSN14-beads  
697 were mixed in 1 ml lysis buffer with 1% NP-40 (Nacalai), and then gently

698 rotated at 4°C overnight to eliminate the non-specific proteins absorbing  
699 onto ODNs or beads. After magnetic pull-down of iSN14-beads, the  
700 supernatants were admixed with iSN04-beads and rotated at 4°C overnight.  
701 The proteins precipitated by iSN04-beads were dissociated in lysis buffer  
702 with 1% NP-40, 10% glycerol, 2% sodium dodecyl sulfate (SDS) at 95°C for 5  
703 min. The supernatants were subjected to SDS-PAGE using an 8%  
704 polyacrylamide gel. The gel was subjected to CBB staining using CBB Stain  
705 One Super (Nacalai) and scanned using ImageQuant LAS 500.

706

#### 707 *Mass spectrometry.*

708 The proteins within the CBB-stained gel were identified by mass  
709 spectrometry (MS Bioworks, MI, USA). In-gel digestion was performed using  
710 the ProGest robot (Digilab, MA, USA). The gels were washed with 25 mM  
711 ammonium bicarbonate followed by acetonitrile, reduced with 10 mM  
712 dithiothreitol at 60°C followed by alkylation with 50 mM iodoacetamide at  
713 room temperature, digested with trypsin (Promega) at 37°C for 4 h, and  
714 quenched with formic acid. Then the supernatant was subjected to analysis  
715 by nano LC-MS/MS with a Waters NanoAcquity HPLC system interfaced to  
716 a Thermo Fisher Q Exactive. Peptides were loaded on a trapping column and  
717 eluted over a 75- $\mu$ m analytical column at 350 nl/min. Both columns were  
718 packed with Luna C18 resin (Phenomenex, CA, USA). The mass  
719 spectrometer was operated in data-dependent mode, with the Orbitrap  
720 operating at 70,000 FWHM and 17,500 FWHM for MS and MS/MS,  
721 respectively. The 15 most abundant ions were selected for MS/MS analysis.



722 Data were searched using a local copy of Mascot with the following  
723 parameters: Enzyme, trypsin/P; Database, SwissProt Mouse; Fixed  
724 modification, carbamidomethyl; Variable modifications, oxidation, acetyl,  
725 pyro-Glu, deamidation; Mass values, monoisotopic; Peptide mass tolerance,  
726 10 ppm; Fragment mass tolerance, 0.02 Da; Max missed cleavages, 2. Mascot  
727 DAT files were parsed into Scaffold (Proteome Software, OR, USA) for  
728 validation, filtering, and to create a non-redundant list per sample. Data  
729 were filtered using 1% protein and peptide FDR, which required at least two  
730 unique peptides per protein.

731

### 732 *Western blotting.*

733 Soluble whole-cell lysates of the hMBs treated with 30  $\mu$ M of iSN04  
734 or AS1411 in DM for 48 h were prepared as described above. The lysates  
735 were denatured with 50 mM Tris-HCl, 10% glycerol, and 2% SDS at 95°C for  
736 5 min. 10  $\mu$ g of protein samples were subjected to SDS-PAGE on a 10%  
737 polyacrylamide gel followed by Western blotting using an iBlot 2 Dry  
738 Blotting System (Thermo Fisher Scientific). 1.0  $\mu$ g/ml each of rabbit  
739 polyclonal anti-nucleolin antibody, mouse monoclonal anti-p53 antibody (PAb  
740 240; Abcam), and mouse monoclonal anti-glyceraldehyde 3-phosphate  
741 dehydrogenase (GAPDH) antibody (5A12; Wako) were used as primary  
742 antibodies. 0.1  $\mu$ g/ml each of horseradish peroxidase (HRP)-conjugated goat  
743 anti-rabbit and anti-mouse IgG antibodies (Jackson ImmunoResearch) were  
744 used as secondary antibodies, respectively. HRP activity was detected using

745 ECL Prime reagents and ImageQuant LAS 500. The quantities of nucleolin  
746 and p53 proteins were normalized to that of GAPDH using ImageJ software.

747

748 ***Statistical analyses.***

749 Results are presented as the mean  $\pm$  standard error. Statistical  
750 comparisons were performed using unpaired two-tailed Student's *t* test,  
751 multiple comparison test with Dunnett's test, Tukey-Kramer test, Scheffe's *F*  
752 test, or Williams' test where appropriate following one-way analysis of  
753 variance using R software. Statistical significance was set to  $p < 0.05$ .

754

755 ***Data availability.***

756 FASTQ raw read data of RNA-seq were deposited in the DDBJ  
757 Sequence Read Archive (DRA; Research Organization of Information and  
758 Systems, National Institute of Genetics, Mishima, Japan) with the accession  
759 number: DRA008498.

760

761 ***Acknowledgments***

762 C57BL/6J mice and C2C12 cells were kindly provided by Dr. Sachi  
763 Tanaka and Dr. Shinichi Yonekura, of Shinshu University. This study was  
764 supported in part by Grants-in Aid from the Japan Society for the Promotion  
765 of Science (16K19397 and 19K05948), the TOBE MAKI Scholarship  
766 Foundation (17-JA-503), the Skylark Food Science Institute, the Takano  
767 Science Foundation, and the Japan Society for Bioscience, Biotechnology,  
768 and Agrochemistry to TT, and a Grant-in-Aid from the Fund of Nagano  
769 Prefecture to Promote Scientific Activity (H30-3-3) to SS.

770

771 ***Author contributions***

772 TT designed the study; TT and KU wrote the manuscript; SS, YN, SN,  
773 and TT performed the experiments and data analyses; KU performed  
774 molecular simulation and proposed iSN04-berberine interaction; TS  
775 designed and provided the ODNs.

776

777 ***Declaration of Competing Interests***

778 Shinshu University has been assigned the invention of myoDNs by  
779 TT, KU, and TS, and Japan Patent Application 2018-568609 has been filed  
780 on February 15, 2018.

781

782 **References**

783

784 Amcheslavsky A, Hemmi H, Akira S, Bar-Shavit Z. 2005. Differential  
785 contribution of osteoclast- and osteoblast-lineage cells to  
786 CpG-oligodeoxynucleotide (CpG-ODN) modulation of osteoclastogenesis.  
787 *Journal of Bone and Mineral Research* 20: 1692-1699.

788 Anker SD, Ponikowski P, Varney S, Chua TP, Clark AL, Webb-Peploe KM,  
789 Harrington D, Kox WJ, Poole-Wilson PA, Coats AJS. 1997. Wasting as  
790 independent risk factor for mortality in chronic heart failure. *Lancet* 349:  
791 1050-1053.

792 Babicki S, Arndt D, Marcu A, Liang Y, Grant JR, Maciejewski A, Wishart DS.  
793 2016. Heatmapper: web-enabled heat mapping for all. *Nucleic Acids*  
794 *Research* 44: W147-W153.

795 Barel M, Le Romancer M, Frade R. 2001. Activation of the EBV/C3d receptor  
796 (CR2, CD21) on human B lymphocyte surface triggers tyrosine  
797 phosphorylation of the 95-kDa nucleolin and its interaction with  
798 phosphatidylinositol 3 kinase. *Journal of Immunology* 166: 3167-3173.

799 Bates PJ, Laber DA, Miller DM, Thomas SD, Trent JO. 2009. Discovery and  
800 development of the G-rich oligonucleotide AS1411 as a novel treatment for  
801 cancer. *Experimental and Molecular Pathology* 86: 151-164.

802 Bauer S, Kirschning CJ, Hacker H, Redecke V, Hausmann S, Akira S,  
803 Wagner H, Lipford GB. 2001. Human TLR9 confers responsiveness to  
804 bacterial DNA via species-specific CpG motif recognition. *Proceedings of*

- 805 *the National Academy of Sciences of the United States of America* 98:  
806 9237-9242.
- 807 Bazzicalupi C, Ferraroni M, Bilia AR, Scheggi F, Gratteri P. 2012. The  
808 crystal structure of human telomeric DNA complexed with berberine: an  
809 interesting case of stacked ligand to G-tetrad ratio higher than 1:1.  
810 *Nucleic Acids Research* 41: 632-638.
- 811 Brack AS, Conboy MJ, Roy S, Lee M, Kuo CJ, Keller C, Rando TA. 2007.  
812 Increased Wnt signaling during aging alters muscle stem cell fate and  
813 increases fibrosis. *Science* 317: 807-810.
- 814 Carrero JJ, Chmielewski M, Axelsson J, Snaedal S, Heimbürger O, Barany P,  
815 Suliman ME, Lindholm B, Stenvinkel P, Qureshi AR. 2008. Muscle  
816 atrophy, inflammation and clinical outcome in incident and prevalent  
817 dialysis patients. *Clinical Nutrition* 27: 557-564.
- 818 Cerone MA, Marchetti A, Bossi G, Blandino G, Sacchi A, Soddu S. 2000. p53  
819 is involved in the differentiation but not in the differentiation-associated  
820 apoptosis of myoblasts. *Cell Death and Differentiation* 7: 506-508.
- 821 Chang JH, Chang EJ, Kim HH, Kim SK. 2009. Enhanced inhibitory effects of  
822 a novel CpG motif on osteoclast differentiation via TREM-2  
823 down-regulation. *Biochemical and Biophysical Research Communications*  
824 389: 28-33.
- 825 Chen J, Guo K, Kastan MB. 2012. Interactions of nucleolin and ribosomal  
826 protein L26 (RPL26) in translational control of human p53 mRNA.  
827 *Journal of Biological Chemistry* 287: 16467-16476.

- 828 Chen Q, Luo S, Zhang Y, Chen Z. 2011. Development of a liquid  
829 chromatography-mass spectrometry method for the determination of  
830 ursolic acid in rat plasma and tissue: application to the pharmacokinetic  
831 and tissue distribution study. *Analytical and Bioanalytical Chemistry* 399:  
832 2877-2884.
- 833 Cheng Y, Zhao G, Zhang S, Nigim F, Zhou G, Yu Z, Song Y, Chen Y, Li Y. 2016.  
834 AS1411-induced growth inhibition of glioma cells by up-regulation of p53  
835 and down-regulation of Bcl-2 and Akt1 via nucleolin. *PLoS One* 11:  
836 e0167094.
- 837 Cui W, Liu CX, Zhang YC, Shen Q, Feng ZH, Wang J, Lu SF, Wu J, Li JX.  
838 2019. A novel oleanolic acid derivative HA-19 ameliorates muscle atrophy  
839 via promoting protein synthesis and preventing protein degradation.  
840 *Toxicology and Applied Pharmacology* 378: 114625.
- 841 Dailey MM, Miller MC, Bates PJ, Lane AN, Trent JO. 2010. Resolution and  
842 characterization of the structural polymorphism of a single  
843 quadruplex-forming sequence. *Nucleic Acids Research* 38: 4877-4888.
- 844 Dumont NA, Bentzinger CF, Sincennes MC, Rudnicki MA. 2015. Satellite  
845 cells and skeletal muscle regeneration. *Comprehensive Physiology* 5:  
846 1027-1059.
- 847 Fahling M, Mrowka R, Steege A, Nebrich G, Perlewitz A, Persson PB, Thiele  
848 BJ. 2006. Translational control of collagen prolyl 4-hydroxylase- $\alpha$ (I) gene  
849 expression under hypoxia. *Journal of Biological Chemistry* 281:  
850 26089-26101.

- 851 Feng Z, Shen Y, Wang L, Cheng L, Wang J, Li Q, Shi W, Sun X. 2011. An  
852 oligodeoxynucleotide with promising modulation activity for the  
853 proliferation and activation of osteoblast. *International Journal of*  
854 *Molecular Sciences* 12: 2543-2555.
- 855 Fukada SI. 2018. The roles of muscle stem cells in muscle injury, atrophy  
856 and hypertrophy. *Journal of Biochemistry* 163: 353-358.
- 857 Girvan AC, Teng Y, Casson LK, Thomas SD, Juliger S, Ball MW, Klein JB,  
858 Pierce WM Jr, Barve SS, Bates PJ. 2006. AGRO100 inhibits activation of  
859 nuclear factor-kappaB (NF-kappaB) by forming a complex with  
860 NF-kappaB essential modulator (NEMO) and nucleolin. *Molecular Cancer*  
861 *Therapeutics* 5: 1790-1799.
- 862 Gu W, Schneider JW, Condorelli G, Kaushal S, Mahdavi V, Nadal-Ginard B.  
863 1993. Interaction of myogenic factors and the retinoblastoma protein  
864 mediates muscle cell commitment and differentiation. *Cell* 72: 309-324.
- 865 Guo Y, Chen Y, Wei Y, Li H, Dong C. 2015. Label-free fluorescent aptasensor  
866 for potassium ion using structure-switching aptamers and berberine.  
867 *Spectrochimica Acta Part A: Molecular and Biomolecular Spectroscopy*  
868 136 Pt C: 1635-1641.
- 869 Harford TJ, Shaltouki A, Weyman CM. 2010. Increased expression of the  
870 pro-apoptotic Bcl2 family member PUMA and apoptosis by the muscle  
871 regulatory transcription factor MyoD in response to a variety of stimuli.  
872 *Apoptosis* 15: 71-82.
- 873 Harford TJ, Kliment G, Shukla GC, Weyman CM. 2017. The muscle  
874 regulatory transcription factor MyoD participates with p53 to directly

- 875 increase the expression of the pro-apoptotic Bcl2 family member PUMA.  
876 *Apoptosis* 22: 1532-1542.
- 877 Hartmann G, Weeratna RD, Ballas ZK, Payette P, Blackwell S, Suparto I,  
878 Rasmussen WL, Waldschmidt M, Sajuthi D, Purcell RH, Davis HL, Krieg  
879 AM. 2000. Delineation of a CpG phosphorothioate oligodeoxynucleotide for  
880 activating primate immune responses in vitro and in vivo. *Journal of*  
881 *Immunology* 164: 1617-1624.
- 882 Hou X, Shen Y, Zhang C, Zhang L, Qin Y, Yu Y, Wang L, Sun X. 2012. A  
883 specific oligodeoxynucleotide promotes the differentiation of osteoblasts  
884 via ERK and p38 MAPK pathways. *International Journal of Molecular*  
885 *Sciences* 13: 7902-7914.
- 886 Huang DW, Sherman BT, Lempicki RA. 2009. Systematic and integrative  
887 analysis of large gene lists using DAVID bioinformatics resources. *Nature*  
888 *Protocols* 4: 44-57.
- 889 Iezzi S, Padova MD, Serra C, Caretti G, Simone C, Maklan E, Minetti G,  
890 Zhao P, Hoffman EP, Puri PL, Sartorelli V. 2004. Deacetylase inhibitors  
891 increase muscle cell size by promoting myoblast recruitment and fusion  
892 through induction of follistatin. *Developmental Cell* 6: 673-684.
- 893 Ikebe J, Umezawa K, Kamiya N, Sugihara T, Yonezawa Y, Takano Y,  
894 Nakamura H, Higo J. 2011. Theory for trivial trajectory parallelization of  
895 multicanonical molecular dynamics and application to a polypeptide in  
896 water. *Journal of Computational Chemistry* 32: 1286-1297.
- 897 Imenshahidi M, Hosseinzadeh H. 2019. Berberine and barberry (*Berberis*  
898 *vulgaris*): A clinical review. *Phytotherapy Research* 33: 504-523.



- 899 Jia W, Yao Z, Zhao J, Guan Q, Gao L. 2017. New perspectives of physiological  
900 and pathological functions of nucleolin (NCL). *Life Sciences* 186: 1-10.
- 901 Juliano RL. 2018. Intracellular trafficking and endosomal release of  
902 oligonucleotides: What we know and what we don't. *Nucleic Acid*  
903 *Therapeutics* 28: 166-177.
- 904 Kim M, Sung B, Kang YJ, Kim DH, Lee Y, Hwang SY, Yoon JH, Yoo MA, Kim  
905 CM, Chung HY, Kim ND. 2015. The combination of ursolic acid and  
906 leucine potentiates the differentiation of C2C12 murine myoblasts  
907 through the mTOR signaling pathway. *International Journal of Molecular*  
908 *Medicine* 35: 755-762.
- 909 Klinman D, Shirota H, Tross D, Sato T, Klaschik S. 2008. Synthetic  
910 oligodeoxynucleotides as modulators of inflammation. *Journal of*  
911 *Leukocyte Biology* 84: 958-964.
- 912 Krieg AM, Yi AK, Matson S, Waldschmidt TJ, Bishop GA, Teasdale R,  
913 Koretzky GA, Klinman DM. 1995. CpG motifs in bacterial DNA trigger  
914 direct B-cell activation. *Nature* 374: 546-549.
- 915 Li N, Liu C, Mi S, Wang N, Zheng X, Li Y, Huang X, He S, Chen H, Xu X.  
916 2012. Simultaneous determination of oleanolic acid, p-coumaric acid,  
917 ferulic acid, kaempferol and quercetin in rat plasma by LC-MS-MS and  
918 application to a pharmacokinetic study of *Oldenlandia diffusa* extract in  
919 rats. *Journal of Chromatographic Science* 50: 885-892.
- 920 Litchfield LM, Riggs KA, Hockenberry AM, Oliver LD, Barnhart KG, Cai J,  
921 Pierce WM Jr, Ivanova MM, Bates PJ, Appana SN, Datta S, Kulesza P,  
922 McBryan J, Young LS, Kling CM. 2012. Identification and

- 923 characterization of nucleolin as a COUP-TFII coactivator of retinoic acid  
924 receptor beta transcription in breast cancer cells. *PLoS One* 7: e38278.
- 925 Losfeld ME, Khoury DE, Mariot P, Carpentier M, Krust B, Briand JP,  
926 Mazurier J, Hovanessian AG, Legrand D. 2009. The cell surface expressed  
927 nucleolin is a glycoprotein that triggers calcium entry into mammalian  
928 cells. *Experimental Cell Research* 315: 357-369.
- 929 Macke TJ, Case DA. 1998. Modeling unusual nucleic acid structures.  
930 *Molecular Modeling of Nucleic Acids* (eds. Leontis NB, SantaLucia J.  
931 Washington, DC: American Chemical Society): 379-393. doi:  
932 10.1021/bk-1998-0682.ch024
- 933 Maier JA, Martinez C, Kasavajhala K, Wickstrom L, Hauser KE,  
934 Simmerling C. 2015. ff14SB: Improving the accuracy of protein side chain  
935 and backbone parameters from ff99SB. *Journal of Chemical Theory and  
936 Computation* 11: 3696-3713.
- 937 Marchildon F, Lamarche E, Lala-Tabbert N, St-Louis C, Wiper-Bergeron N.  
938 2015. Expression of CCAAT/enhancer binding protein beta in muscle  
939 satellite cells inhibits myogenesis in cancer cachexia. *PLoS One* 10:  
940 e0145583.
- 941 McCormick R, Vasilaki A. 2018. Age-related changes in skeletal muscle:  
942 changes to life-style as a therapy. *Biogerontology* 19: 519-536.
- 943 Nigar S, Yamamoto Y, Okajima T, Shigemori S, Sato T, Ogita T, Shimosato T.  
944 2017. Synergistic oligodeoxynucleotide strongly promotes CpG-induced  
945 interleukin-6 production. *BMC Immunology* 18: 44.

- 946 Nihashi Y, Ono T, Kagami H, Takaya T. 2019a. Toll-like receptor  
947 ligand-dependent inflammatory responses in chick skeletal muscle  
948 myoblasts. *Developmental and Comparative Immunology* 91: 115-122.
- 949 Nihashi Y, Umezawa K, Shinji S, Hamaguchi Y, Kobayashi H, Kono T, Ono T,  
950 Kagami H, Takaya T. 2019b. Distinct cell proliferation, myogenic  
951 differentiation, and gene expression in skeletal muscle myoblasts of layer  
952 and broiler chickens. *Scientific Reports* 9: 16527.
- 953 Norgaard NN, Holien T, Jonsson S, Hella H, Espevik T, Sundan A, Standal T.  
954 2010. CpG-oligodeoxynucleotide inhibits Smad-dependent bone  
955 morphogenetic protein signaling: effects on myeloma cell apoptosis and in  
956 vitro osteoblastogenesis. *Journal of Immunology* 185: 3131-3139.
- 957 Novitch BG, Mulligan GJ, Jacks T, Lassar AB. 1996. Skeletal muscle cells  
958 lacking the retinoblastoma protein display defects in muscle gene  
959 expression and accumulate in S and G2 phases of the cell cycle. *Journal of*  
960 *Cell Biology* 135: 441-456.
- 961 Ou TM, Lu YJ, Tan JH, Huang ZS, Wong KY, Gu LQ. 2008. G-quadruplex:  
962 Targets in anticancer drug design. *ChemMedChem* 3: 690-713.
- 963 Pohar J, Lainscek D, Fukui R, Yamamoto C, Miyake K, Jerala R, Bencina M.  
964 2015. Species-specific minimal sequence motif for  
965 oligodeoxyribonucleotides activating mouse TLR9. *Journal of Immunology*  
966 195: 4396-4405.
- 967 Porrello A, Cerone MA, Coen S, Gurtner A, Fontemaggi G, Cimino L, Piaggio  
968 G, Sacchi A, Soddu S. 2000. p53 regulates myogenesis by triggering the  
969 differentiation activity of pRb. *Journal of Cell Biology* 151: 1295-1304.

- 970 Quemener AM, Bachelot L, Forestier A, Donnou-Fournet E, Gilot D, Galibert  
971 MD. 2020. The powerful world of antisense oligonucleotides: from bench to  
972 bedside. *WIREs RNA* e1594.
- 973 Ramos KS, Moore S, Runge I, Tavera-Garcia MA, Cascone I, Courty J,  
974 Reyes-Reyes EM. 2020. The nucleolin antagonist N6L inhibits LINE1  
975 retrotransposon activity in non-small cell lung carcinoma cells. *Journal of*  
976 *Cancer* 11: 733-740.
- 977 Reyes-Reyes EM, Salipur FR, Shams M, Forsthoefel MK, Bates PJ. 2015.  
978 Mechanistic studies of anticancer aptamer AS1411 reveal a novel role for  
979 nucleolin in regulating Rac1 activation. *Molecular Oncology* 9: 1392-1405.
- 980 Rubin H. 2003. Cancer cachexia: its correlations and causes. *Proceedings of*  
981 *the National Academy of Sciences of the United States of America* 100:  
982 5384-5389.
- 983 Ruijtenberg S, den Heuvel S. 2016. Coordinating cell proliferation and  
984 differentiation: Antagonism between cell cycle regulators and cell  
985 type-specific gene expression. *Cell Cycle* 15: 196-212.
- 986 Sackesen C, van de Veen W, Akdis M, Soyer O, Zumkehr J, Ruckert B, Stanic  
987 B, Kalayci O, Alkan SS, Gursel I, Akdis CA. 2013. Suppression of B-cell  
988 activation and IgE, IgA, IgG1 and IgG4 production by mammalian  
989 telomeric oligonucleotides. *Allergy* 68: 593-603.
- 990 Shaltouki A, Freer M, Mei Y, Weyman CM. 2007. Increased expression of the  
991 pro-apoptotic Bcl2 family member PUMA is required for mitochondrial  
992 release of cytochrome C and the apoptosis associated with skeletal  
993 myoblast differentiation. *Apoptosis* 12: 2143-2154.

- 994 Shen Y, Feng Z, Lin C, Hou X, Wang X, Wang J, Yu Y, Wang L, Sun X. 2012.  
995 An oligodeoxynucleotide that induces differentiation of bone marrow  
996 mesenchymal stem cells to osteoblasts in vitro and reduces alveolar bone  
997 loss in rats with periodontitis. *International Journal of Molecular Sciences*  
998 13: 2877-2892.
- 999 Shinji S, Nakamura S, Nihashi Y, Umezawa K, Takaya T. 2020. Berberine  
1000 and palmatine inhibit growth of human rhabdomyosarcoma cells.  
1001 *Bioscience, Biotechnology, and Biochemistry* 84: 63-75.
- 1002 Siddiqui-Jain A, Grand CL, Bearss DJ, Hurley LH. 2002. Direct evidence for  
1003 a G-quadruplex in a promoter region and its targeting with a small  
1004 molecule to repress *c-MYC* transcription. *Proceedings of the National*  
1005 *Academy of Sciences of the United States of America* 99: 11593-11598.
- 1006 Soddu S, Blandino G, Scardigli R, Coen S, Marchetti A, Rizzo MG, Bossi G,  
1007 Cimino L, Crescenzi M, Sacchi A. 1996. Interference with p53 protein  
1008 inhibits hematopoietic and muscle differentiation. *Journal of Cell Biology*  
1009 134: 193-204.
- 1010 Szklarczyk D, Gable AL, Lyon D, Junge A, Wyder S, Huerta-Cepas J,  
1011 Simonovic M, Doncheva NT, Morris JH, Bork P, Jensen LJ, Mering CV.  
1012 2019. STRING v11: protein-protein association networks with increased  
1013 coverage, supporting functional discovery in genome-wide experimental  
1014 datasets. *Nucleic Acids Research* 47: D607-D613.
- 1015 Takagi M, Absalon MJ, McLure KG, Kastan MB. 2005. Regulation of p53  
1016 translation and induction after DNA damage by ribosomal protein L26  
1017 and nucleolin. *Cell* 123: 49-63.

- 1018 Takaya T, Nihashi Y, Kojima S, Ono T, Kagami H. 2017. Autonomous  
1019 xenogenic cell fusion of murine and chick skeletal muscle myoblasts.  
1020 *Animal Science Journal* 88: 1880-1885.
- 1021 Tang Z, Qiu H, Luo L, Liu N, Zhong J, Kang K, Gou D. 2017. miR-34b  
1022 modulates skeletal muscle cell proliferation and differentiation. *Journal of*  
1023 *Cellular Biochemistry* 118: 4285-4295.
- 1024 Teng Y, Girvan AC, Casson LK, Pierce WM Jr, Qian M, Thomas SD, Bates PJ.  
1025 2007. AS1411 alters the localization of a complex containing protein  
1026 arginine methyltransferase 5 and nucleolin. *Cancer Research* 67:  
1027 10491-10500.
- 1028 Tsui V, Case DA. 2000. Theory and applications of the generalized born  
1029 solvation model in macromolecular simulations. *Biopolymers* 56: 275-291.
- 1030 Vollmer J, Krieg AM. 2009. Immunotherapeutic applications of CpG  
1031 oligodeoxynucleotide TLR9 agonists. *Advanced Drug Delivery Reviews* 61:  
1032 195-204.
- 1033 Wang H, Chen Y, Lu XA, Liu G, Fu Y, Luo Y. 2015. Endostatin prevents  
1034 dietary-induced obesity by inhibiting adipogenesis and angiogenesis.  
1035 *Diabetes* 64: 2442-2456.
- 1036 Wang J, Wolf RM, Caldwell JW, Kollman PA, Case DA. 2004. Development  
1037 and testing of a general amber force field. *Journal of Computational*  
1038 *Chemistry* 25: 1157-1174.
- 1039 Wang T, Chen C, Larcher LM, Barrero R, Veedu RN. 2019. Three decades of  
1040 nucleic acid aptamer technologies: Lessons learned, progress and  
1041 opportunities on aptamer development. *Biotechnology Advances* 37: 28-50.

- 1042 Wang Y, Yamamoto Y, Shigemori S, Watanabe T, Oshiro K, Wang X, Wang P,  
1043 Sato T, Yonekura S, Tanaka S, Kitazawa H, Shimosato T. 2015.  
1044 Inhibitory/suppressive oligodeoxynucleotide nanocapsules as simple oral  
1045 delivery devices for preventing atopic dermatitis in mice. *Molecular*  
1046 *Therapy* 23: 297-309.
- 1047 Yamamoto Y, Sugimura R, Watanabe T, Shigemori S, Okajima T, Nigar S,  
1048 Namai F, Sato T, Ogita T, Shimosato T. 2017. Class A CpG  
1049 oligodeoxynucleotide priming rescues mice from septic shock via  
1050 activation of platelet-activating factor acetylhydrolase. *Frontiers in*  
1051 *Immunology* 8: 1049.
- 1052 Yang G, Wan M, Zhang Y, Sun L, Sun R, Hu D, Zhou X, Wang L, Wu X, Wang  
1053 L, Yu Y. 2010. Inhibition of a C-rich oligodeoxynucleotide on activation of  
1054 immune cells in vitro and enhancement of antibody response in mice.  
1055 *Immunology* 131: 501-512.
- 1056 Yazidan-Robati R, Bayat P, Oroojalian F, Zargari M, Ramezani M, Taghdisi  
1057 SM, Abnous K. 2019. Therapeutic applications of AS1411 aptamer, an  
1058 update review. *International Journal of Biological Macromolecules* 155:  
1059 1420-1431.
- 1060 Yu G, He QY. 2016. ReactomePA: an R/Bioconductor package for reactome  
1061 pathway analysis and visualization. *Molecular BioSystems* 2016; 12:  
1062 477-479.
- 1063 Zhang L, Wang XH, Wang H, Du J, Mitch WE. 2010. Satellite cell  
1064 dysfunction and impeired IGF-1 signaling cause CKD-induced muscle  
1065 atrophy. *Journal of the American Society of Nephrology* 21: 419-427.

1066 Zou W, Amcheslavsky A, Bar-Shavit Z. 2003. CpG oligodeoxynucleotides  
1067 modulate the osteoclastogenic activity of osteoblasts via Toll-like receptor  
1068 9. *Journal of Biological Chemistry* 278: 16732-16740.  
1069



1070 **Figure Legends**

1071

1072 **Figure 1.** Identification of myoDNs. **(A)** Ratio of MHC<sup>+</sup> cells within the  
1073 screened mMBs treated with 10  $\mu$ M PS-ODNs in GM for 48 h (screening  
1074 system). \*\*  $p < 0.01$  (Dunnett's test).  $n = 3$ . **(B)** Representative  
1075 immunofluorescent images of the hMBs treated with 10  $\mu$ M iSN04 in DM for  
1076 48 h. Scale bar, 200  $\mu$ m. Ratio of MHC<sup>+</sup> cells and multinuclear myotubes  
1077 were quantified. \*\*  $p < 0.01$  (Student's  $t$  test).  $n = 6$ . **(C)** Relative numbers of  
1078 the mMBs and MEFs treated with 1 or 3  $\mu$ M iSN04 in GM for each cell.  
1079 Mean value of the control sample at 0 h was set to 1.0 for each experiment. \*  
1080  $p < 0.05$ , \*\*  $p < 0.01$  vs control at each time point (William's test).  $n = 3$ . **(D)**  
1081 qPCR results of myogenic gene expression in the hMBs treated with 30  $\mu$ M  
1082 iSN04 in DM for 24 h. Mean value of control hMBs was set to 1.0. \*  $p < 0.05$ ,  
1083 \*\*  $p < 0.01$  vs control (Student's  $t$  test).  $n = 3$ . **(E)** Representative fluorescent  
1084 images of the hMBs treated with 5  $\mu$ g/ml 6-FAM-iSN04 in GM. Scale bar, 100  
1085  $\mu$ m. **(F)** MHC signal intensities of the hMBs treated with 30  $\mu$ M of iSN04,  
1086 CpG-2006, or Tel-ODN in DM for 48 h (screening system). NS, no significant  
1087 difference (Scheffe's  $F$  test).  $n = 3$ .

1088

1089 **Figure 2.** Profile of iSN04-dependent gene expression. **(A)** Scattered plot of  
1090 the 476 iSN04-upregulated DEGs significantly ( $p < 5.0 \times 10^{-3}$ ) enriched in GO  
1091 terms. **(B)** Scattered plot of the 423 iSN04-downregulated DEGs significantly  
1092 ( $p < 5.0 \times 10^{-6}$ ) enriched in GO terms. **(C)** Functional and physiological

1093 networks within the 476 iSN04-upregulated DEGs (left panel) and the 423  
1094 iSN04-downregulated DEGs (right panel) visualized via STRING analysis.

1095

1096 **Figure 3.** Berberine enhances iSN04 activity by causing a shift in molecular  
1097 structure. **(A)** The conformation of iSN04 simulated via TTP-McMD. **(B)**  
1098 Contact map of iSN04. The scale indicates contact probability. **(C)** The  
1099 simulated conformation of iSN04-berberine complex. Berberine is shown as a  
1100 sphere model. **(D)** Contact map of iSN04-berberine complex. “B” indicates  
1101 berberine. **(E)** Representative images of agarose gel electrophoresis of iSN04  
1102 mixed with berberine (Ber) in F10 medium. The EtBr-stained and  
1103 UV-irradiated gel was scanned without filters (upper image) and with a  
1104 560-nm filter (lower image). **(F)** Ratio of MHC<sup>+</sup> cells within the mMBs  
1105 treated with 10 μM iSN04 and 10 μM berberine in GM for 48 h (screening  
1106 system). \*\*  $p < 0.01$ ; NS, no significant difference (Scheffe’s  $F$  test).  $n = 3$ . **(G)**  
1107 Ratio of MHC<sup>+</sup> cells within the mMBs treated with 10 μM of mutant iSN04  
1108 in GM for 48 h (screening system). \*  $p < 0.05$ , \*\*  $p < 0.01$  vs control; ††  $p <$   
1109 0.01 vs iSN04 (Scheffe’s  $F$  test).  $n = 3$ . **(H)** Ratio of MHC<sup>+</sup> cells within the  
1110 mMBs treated with 0, 1, or 3 μM iSN04 and 0, 1, 3, 10, or 30 μM of berberine  
1111 in GM for 48 h (screening system). \*  $p < 0.05$  vs 0 μM-iSN04 + 0  
1112 μM-berberine; †  $p < 0.05$ , ††  $p < 0.01$  vs 3 μM-iSN04 + 0 μM-berberine  
1113 (Scheffe’s  $F$  test).  $n = 3$ . **(I)** Representative images of agarose gel  
1114 electrophoresis of mutant iSN04 mixed with berberine in F10 medium. **(J)**  
1115 Representative images of agarose gel electrophoresis of iSN04 mixed with  
1116 coptisine (Cop), berberine, palmatine (Pal), or jatrorrhizine (Jat) in F10

1117 medium. (K) Ratio of MHC<sup>+</sup> cells within the mMBs treated with 10  $\mu$ M  
1118 iSN04 and 10  $\mu$ M berberine analogs in GM for 48 h (screening system). \*  $p <$   
1119 0.05 vs control-iSN04(-); ††  $p < 0.01$  vs control-iSN04(+) (Tukey-Kramer test).  
1120  $n = 3$ .

1121

1122 **Figure 4.** iSN04 targets nucleolin and improves p53 protein level. (A)  
1123 Representative image of CBB-stained SDS-PAGE gel of the  
1124 ODN-precipitated proteins. The arrow indicates the bands subjected to mass  
1125 spectrometry. (B) Representative immunofluorescent images of the hMBs  
1126 treated with 10  $\mu$ M of iSN04 or AS1411 in DM for 48 h. Scale bar, 200  $\mu$ m.  
1127 Ratio of MHC<sup>+</sup> cells and multinuclear myotubes were quantified. \*\*  $p < 0.01$   
1128 vs control; NS, no significant difference (Student's  $t$  test).  $n = 6$ . (C)  
1129 Representative immunofluorescent images of the hMBs maintained in DM at  
1130 day 0, 2, and 4. Scale bar, 50  $\mu$ m. (D) Representative immunofluorescent  
1131 images of the hMBs treated with 30  $\mu$ M of iSN04 or AS1411 in DM for 48 h.  
1132 Scale bar, 50  $\mu$ m. (E) Scattered plot of the 899 iSN04-dependent DEGs  
1133 significantly (FDR  $p < 0.05$ ) enriched in KEGG pathways. (F) Representative  
1134 images of Western blotting (10  $\mu$ g protein/lane) of p53, nucleolin, and  
1135 GAPDH in soluble whole cell lysates of the hMBs treated with 30  $\mu$ M of  
1136 iSN04 or AS1411 in DM for 48 h. Amounts of p53 and nucleolin were  
1137 normalized using GAPDH. Mean value of control hMBs was set to 1.0. \*  $p <$   
1138 0.05, \*\*  $p < 0.01$  vs control (Scheffe's  $F$  test).  $n = 3$ .

Figure 1

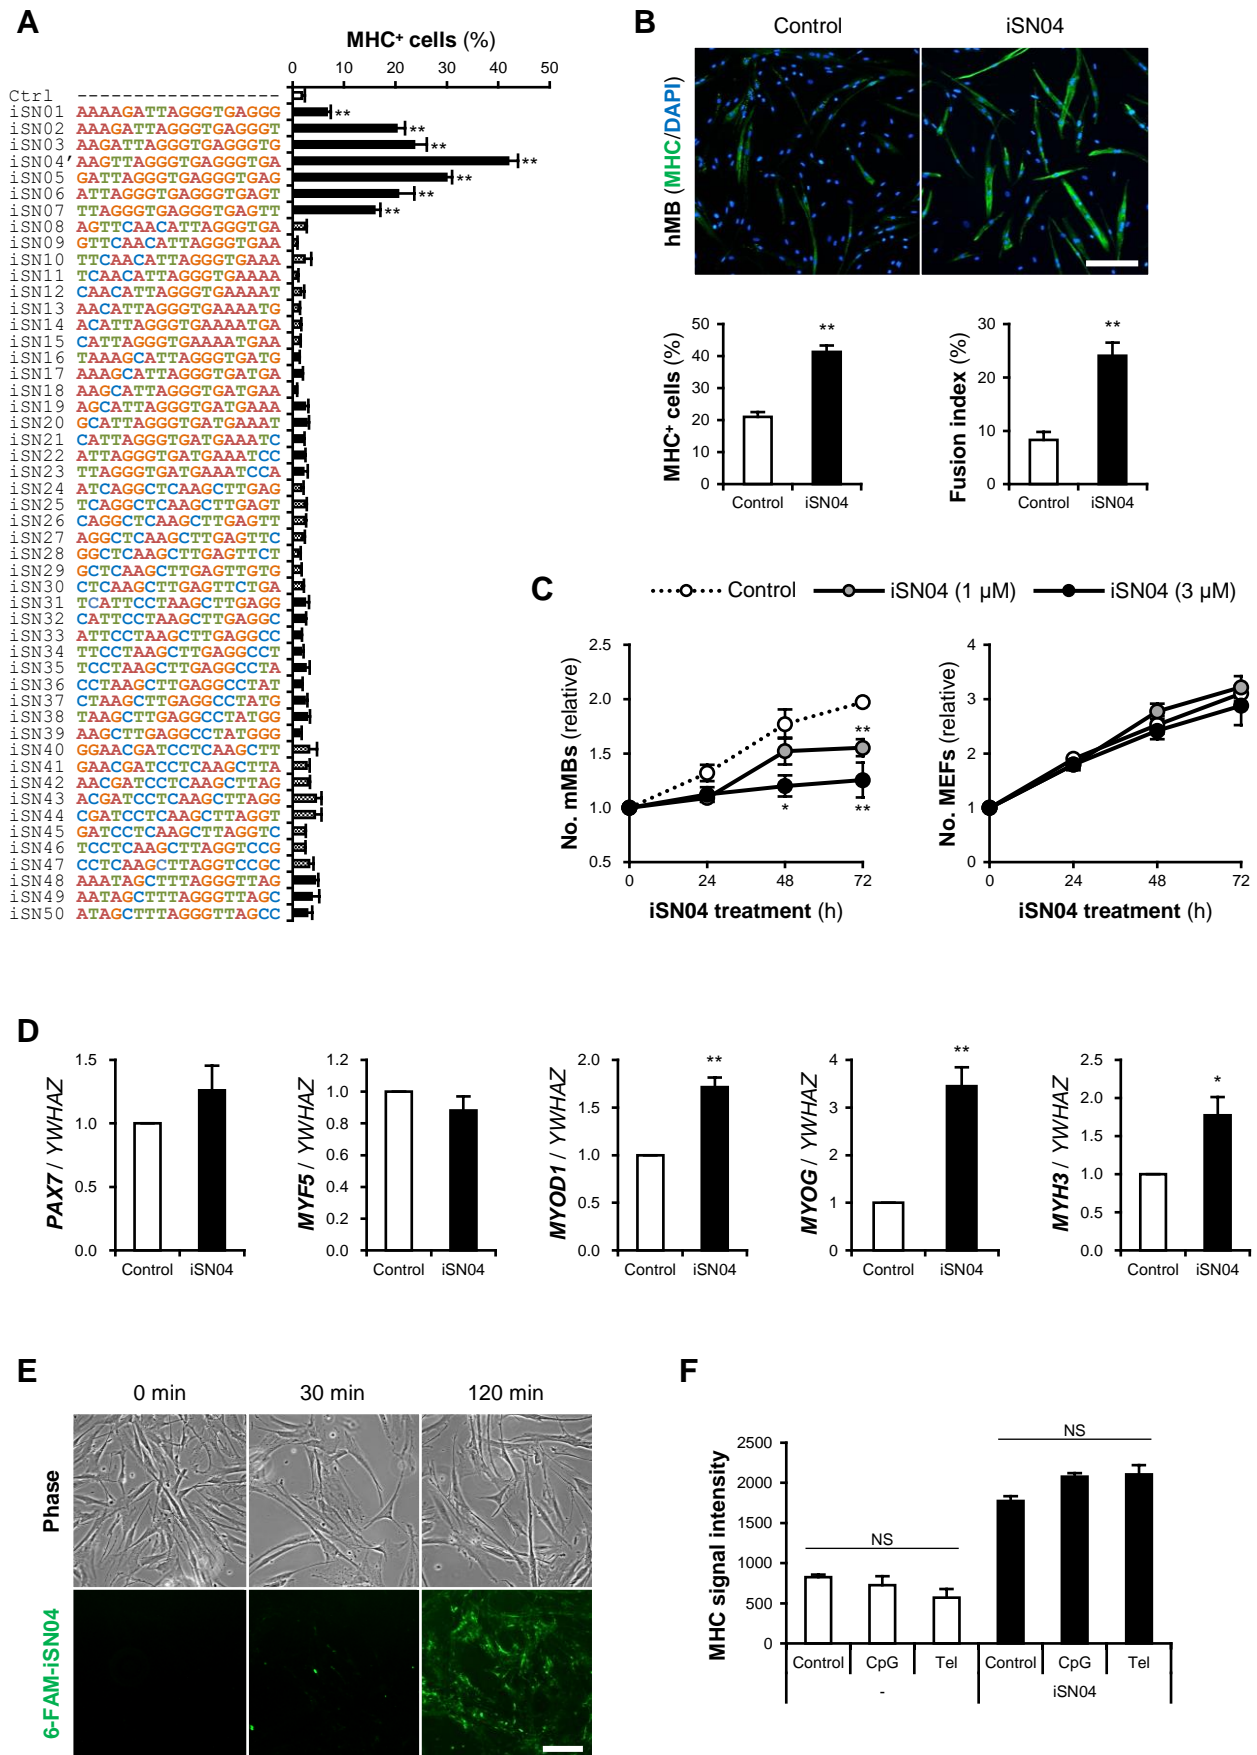

**Figure 2**

**A**

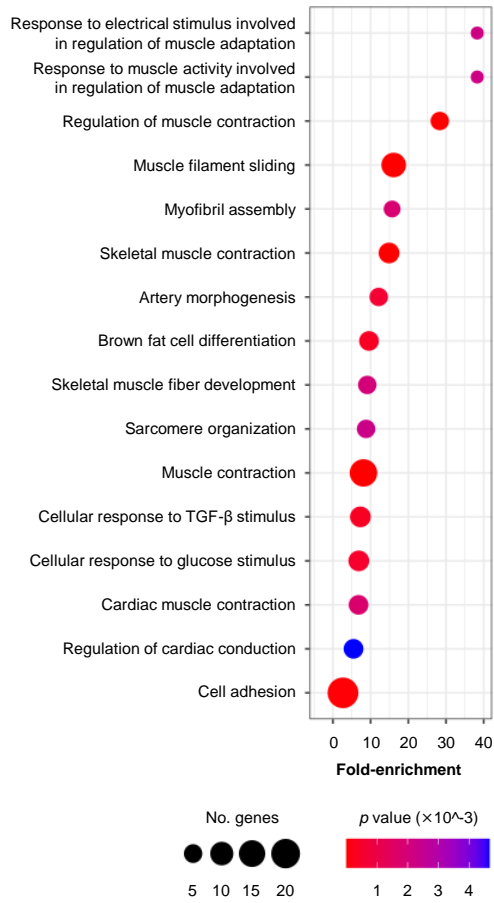

**B**

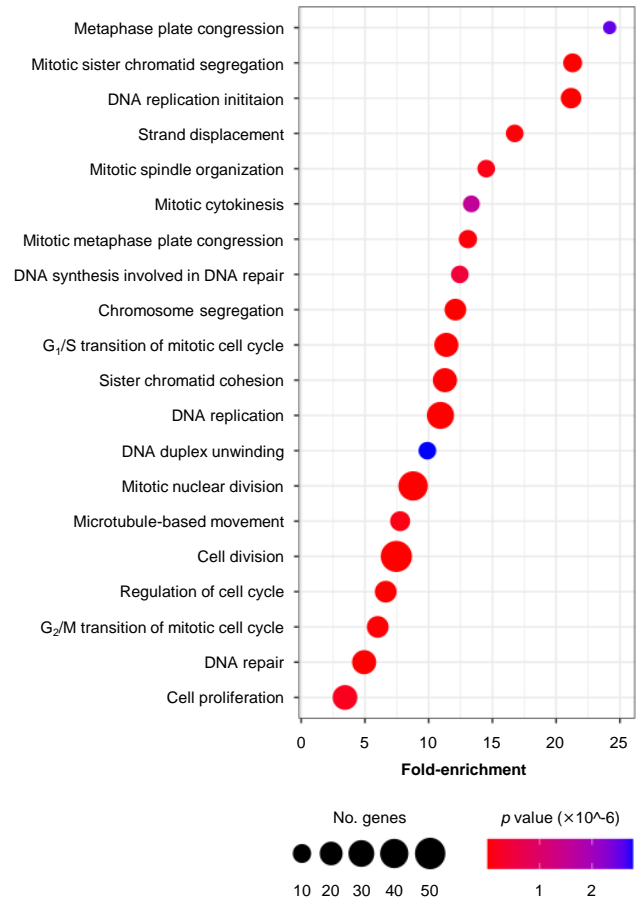

**C**

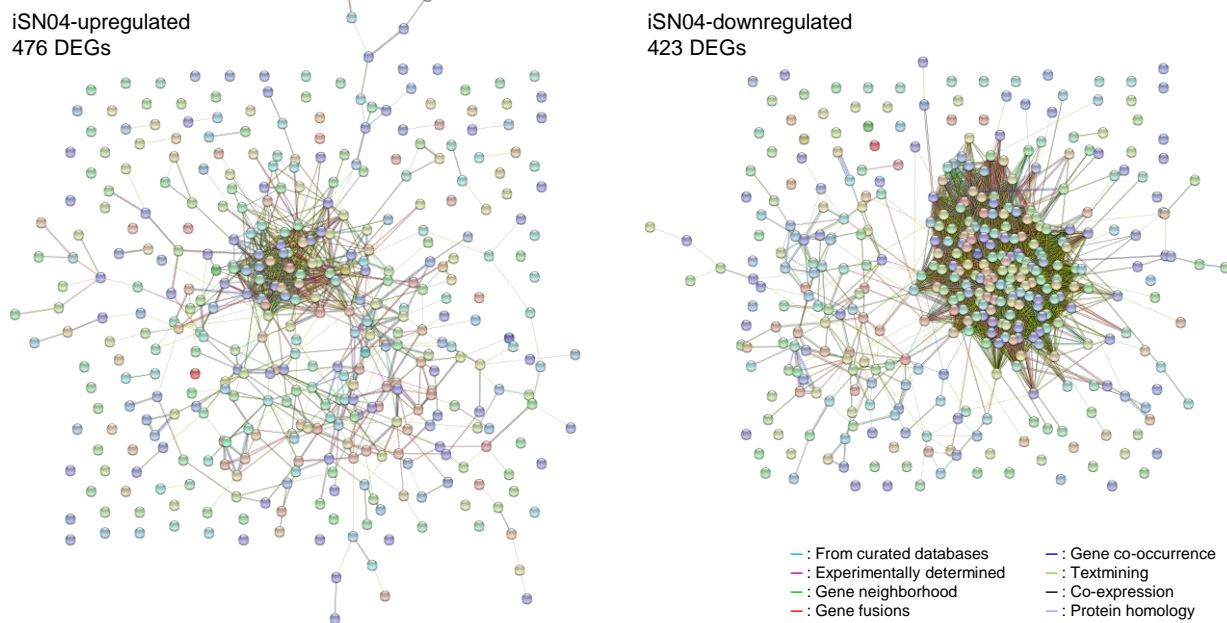

**Figure 3**

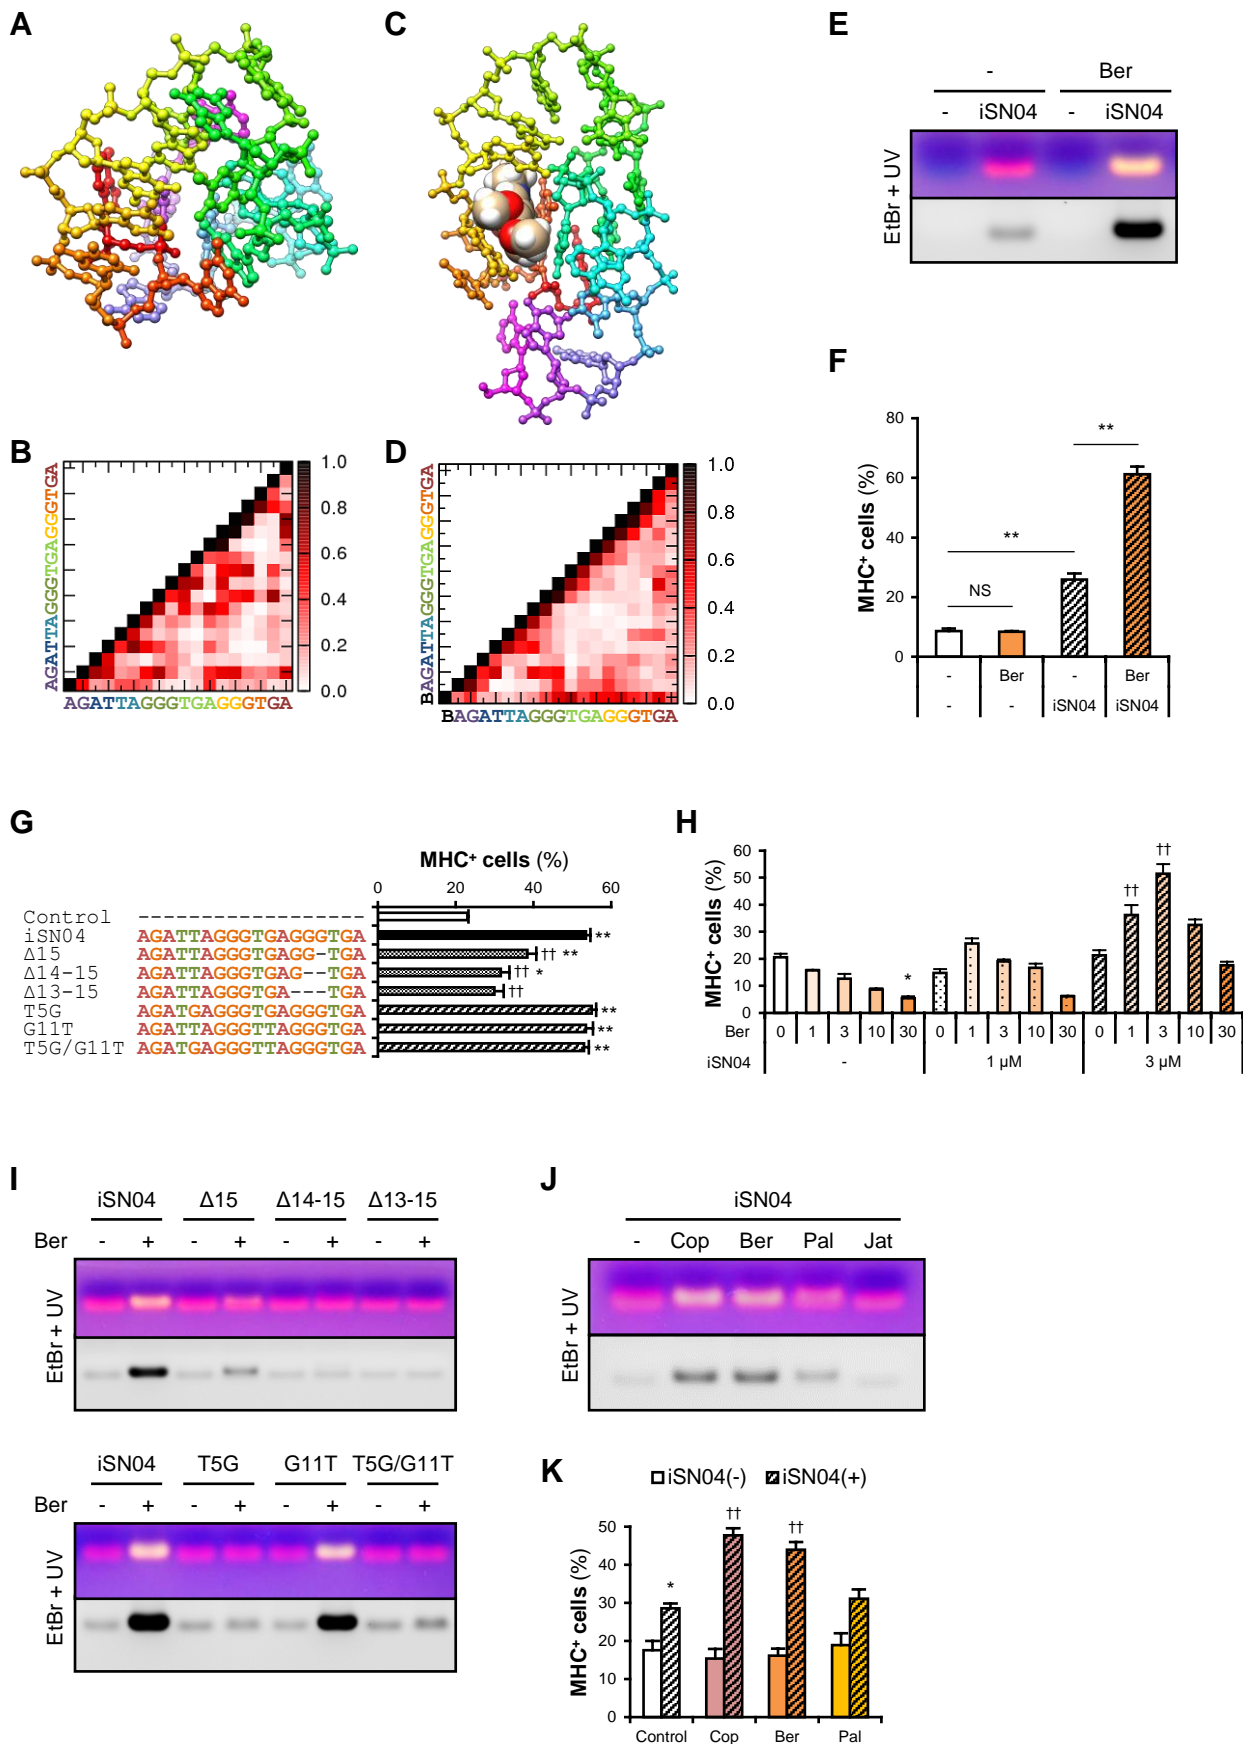

**Figure 4**

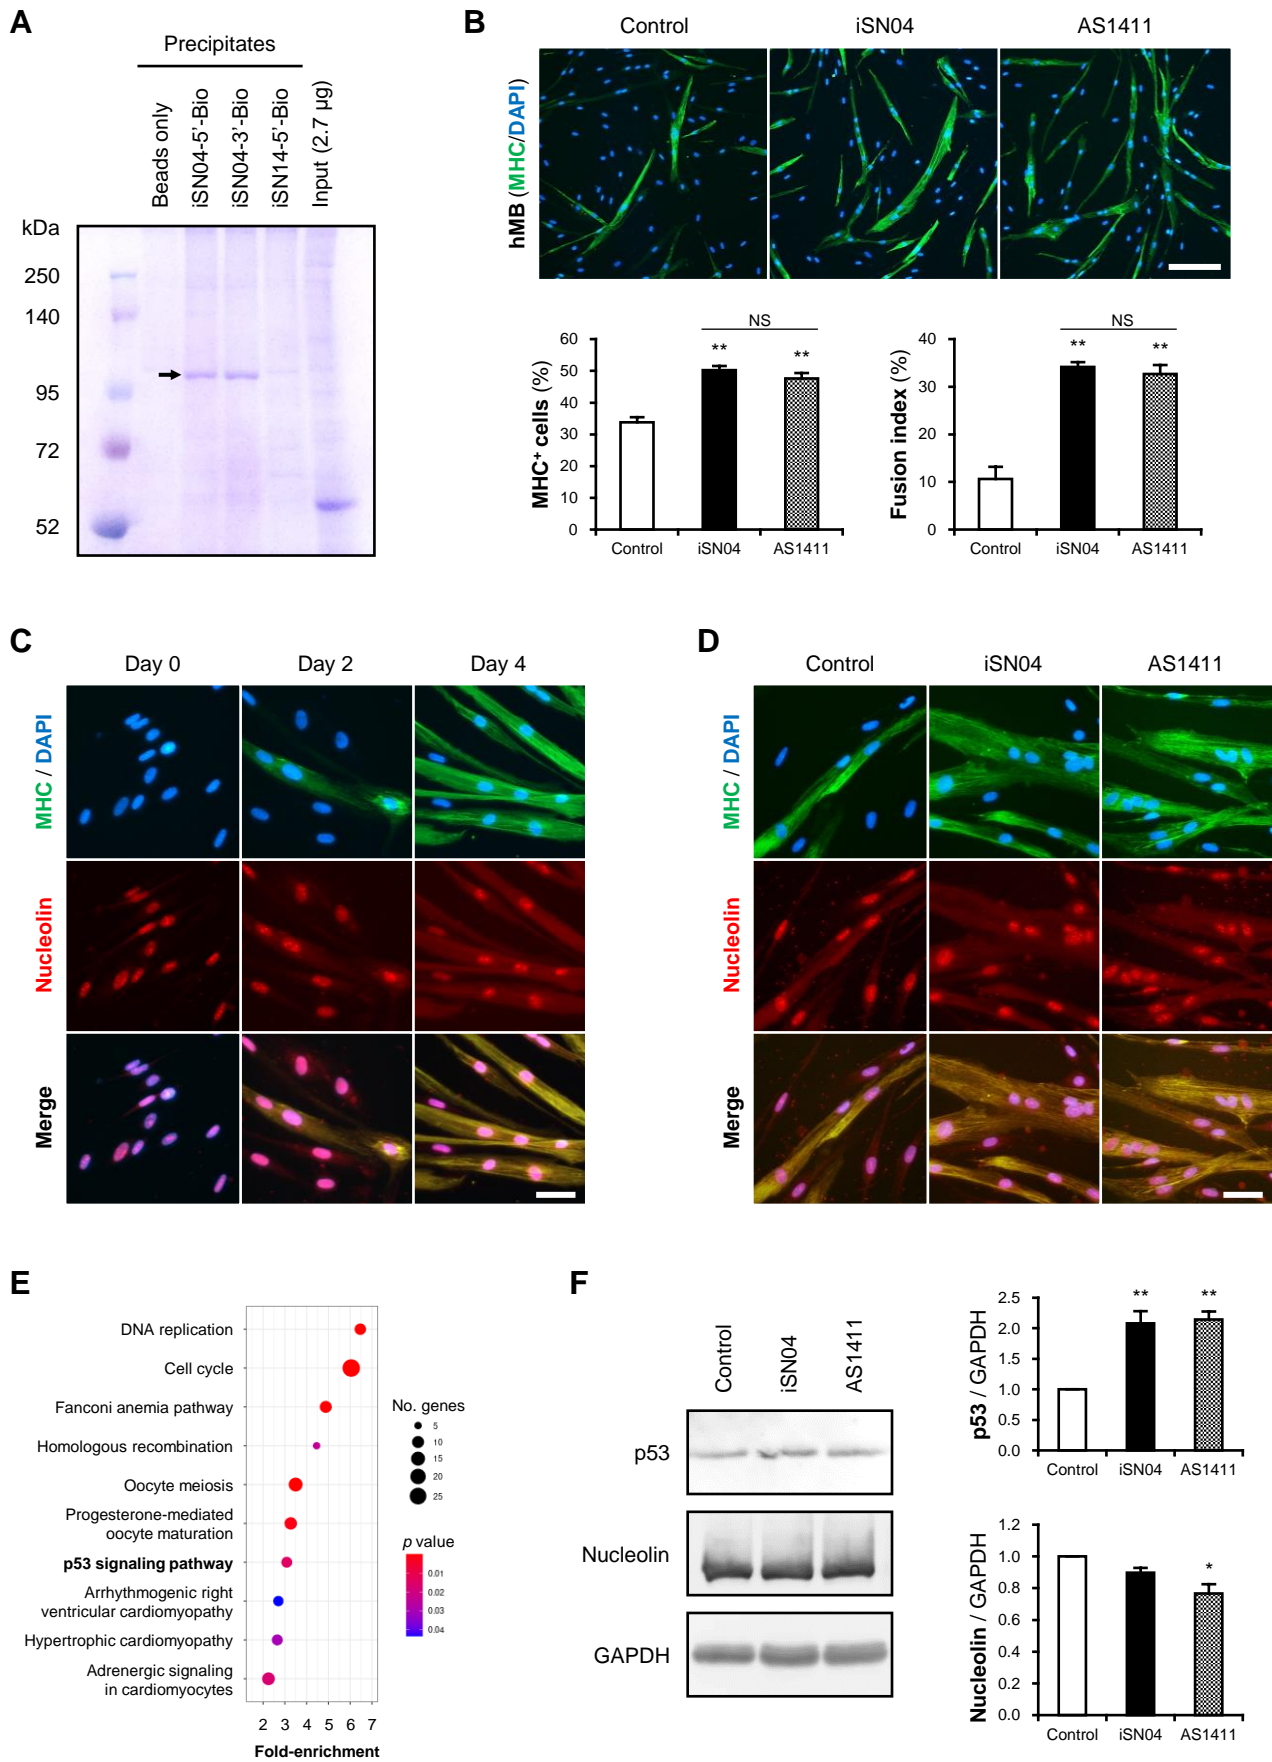

Source: http://biorxiv.org/content/10.1101/2020.10.07.330472v1.full.pdf
